# Supplementary material
Source: HighWire-hosted journal article supplement (https://bmjopen.bmj.com/content/15/1/e086976)
Supplement: inline-supplementary-material-2 [file inline-supplementary-material-2.xlsx]

## Sheet: Characteristics of Sources
Authors	year	Source type	Population	Care Focus	Publication Type	Country	Authors Professional Background	First author background
Aizen, Shugaev & Lenger	2006	Non-Interventional Retrospective	Geriatric Rehabilitation	Rehabiliation/ Post Acute	Journal Article	#VALUE!	None Given
Artaza, Valera, San Juan, Urien, Fernandez & Malafarina	2016	Non-Interventional Prospective	Functional Recovery Unit	Rehabiliation/ Post Acute	Conference Abstract	#VALUE!	None Given
Asif, Taube, Sivarajah, Tsironis & Koizia	2020	QI- Mixed	Surgery	Acute	Conference Abstract	#VALUE!	None Given
Bailey, Miller, Russell & Clemmer.	2009	Editorial	ICU	ICU	Journal Article	#VALUE!	Nursing, Medicine	Nursing
Baztan, Galvez, Cesar, & Socorro	2009	Non-Interventional Prospective	Geriatric Medicine	Rehabiliation/ Post Acute	Journal Article	#VALUE!	Medicine	Medicine
Beam, Gorman, Kist, Giles, Kiser & Dumire	2022	QI - Interventional	Medical and Surgical	Acute	Journal Article	#VALUE!	Nursing, Advanced Care Practioner, Physical Therapy, occupational therapists,, Medicine	Nursing
Beisheim-Ryan, Butera, Hinrichs, Derlein, Malong, Holtrop, Forster, Diedrich, Gustavson, & Stevens-Lapsley	2023	Protocol	Skilled nursing facilities	Rehabiliation/ Post Acute	Journal Article	#VALUE!	Physical Therapy	Physical Therapy
Belavy, Miokovic, Armbrecht, Richardson, Rittweger & Felsenberg	2009	Non-Interventional Prospective	Research	Other	Journal Article	#VALUE!	None Given
Bono & Reyes	2020	QI Non-Interventional	Medicine and Surgery Registered Nurses, Patient Care Associates and Residents	Acute	Conference Abstract	#VALUE!	None Given
Booth, Rivet, Flici, Harvey, Hamill, Hundley, Holland, Hubbard, Trivedi & Collier	2016	QI- Mixed	Neurotrauma ICU	ICU	Journal Article	#VALUE!	Nursing, Medicine, Physiotherapy, Registered Respiratory Therapy, Osteopathy	Nursing
Brown, Friedkin & Inouye	2004	Non-Interventional Prospective	General Medicine	Acute	Journal Article	#VALUE!	Medicine	Medicine
Brown, Rothe, Peel, & Allman	2006	Non-Interventional Prospective	All	Acute	Journal Article	#VALUE!	Medicine, Physical Therapy	Medicine
Burkhardt & Parigger	2018	Non-Interventional Cross Sectional	Geriatric Early Rehabilitation	Rehabiliation/ Post Acute	Conference Abstract	#VALUE!	None Given
Butler & Welford	2021	QI - Interventional	Geriatric Medicine	Acute	Conference Abstract	#VALUE!	None Given
Cabilan, Hines & Munday	2013	Systematic Review	Surgical Prehabilitation	Other	Journal Article	#VALUE!	Nursing	Nursing
Chastin, Harvey, Dall, McInally, Mavroeidi & Skelton	2019	Editorial	All	Acute	Journal Article	#VALUE!	None Given
Churilov, Churilov, Brock, Murphy, Macisaac, & Ekinci	2019	Non-Interventional Cross Sectional	Inpatient Rehabilitation	Rehabiliation/ Post Acute	Conference Abstract	#VALUE!	None Given
Churilov, Churilov, Maclsaac & Ekinci	2018	Systematic Review	Inpatient Rehabilitation	Rehabiliation/ Post Acute	Journal Article	#VALUE!	None Given
Conlin Shaw, M	1996	Editorial	All	Acute	Journal Article	#VALUE!	Nursing	Nursing
Corcoran, Gavaghan, Lyons & Moloney	2017	QI - Interventional	Geriatric Medicine	Acute	Conference Abstract	#VALUE!	Physical Therapy, Occupational Therapy, Nursing	Physical Therapy
Covinsky, Pierluissi & Johnston	2011	Narrative Literature Review	Geriatric Medicine	Acute	Journal Article	#VALUE!	Medicine	Medicine
Creditor	1993	Editorial	Geriatric Medicine	Acute	Journal Article	#VALUE!	Medicine	Medicine
De Morton, Keating & Jeffs	2007	Systematic Review	General Medicine	Acute	Journal Article	#VALUE!	None Given
Dennis, Johnson, Roberson, Heif, Bopp, Garner, Padala, Padala, Dubbert & Sullivan	2012	Non-Interventional Prospective	Recuperation and Recovery Ward	Rehabiliation/ Post Acute	Journal Article	#VALUE!	Economics, Medicine, Biostatistics, Psychology,	Economics
Deshpande, MacNeill, Lichtenberg, Pithadia & Velez	1998	Non-Interventional Retrospective	Geriatric Rehabilitation	Rehabiliation/ Post Acute	Journal Article	#VALUE!	Psychology, Neuropsychology, Medicine	Psychology
Dirkes & Kozlowski	2019	Editorial	ICU	ICU	Journal Article	#VALUE!	Nursing	Nursing
Doherty-King & Bowers	2013	Secondary Analysis	Medicine and Surgery Registered Nurses	Acute	Journal Article	#VALUE!	Nursing	Nursing
Donnelly, Jevons and Wentworth	2018	QI - Interventional	Geriatric Rehabilitation	Rehabiliation/ Post Acute	Conference Abstract	#VALUE!	None Given
Drolet, Dejuilio, Harkless, Henricks, Kamin, Leddy, Lloyd, Waters & Williams	2013	QI- Mixed	ICU and Intermediate Care	ICU	Journal Article	#VALUE!	Nursing, Physiotherapy, Occupational Therapy, Pharmacy, Respiratory Therapy, Medicine	Nursing
Engel, Tatebe, Alonzo, Mustille & Rivera	2013	QI- Mixed	Medical and Surgical ICU	ICU	Journal Article	#VALUE!	Physical Therapy	Physical Therapy
Falvey, Mangione & Stevens-Lapsley	2015	Editorial	Geriatric Medicine	Acute	Journal Article	#VALUE!	Physical Therapy	Physical Therapy
Fisher, Graham, Krishnana & Ottenbacher	2016	Non-Interventional Retrospective	Geriatric Rehabilitation	Rehabiliation/ Post Acute	Journal Article	#VALUE!	Physical Therapy, Chiropractor, Occupational Therapy	Physical Therapy
Friedman, Mayer, Hoyer & Atanelov	2013	QI- Mixed	General Medicine	Acute	Conference Abstract	#VALUE!	Medicine, Physical Therapy	Medicine
Galloway, Karmarkar, Graham, Tan, Raji, Granger & Ottenbacher	2016	Non-Interventional Retrospective	Inpatient Rehabilitation	Rehabiliation/ Post Acute	Journal Article	#VALUE!	Physical Therapy, Occupational Therapy, Chiropractor, Medicine	Physical Therapy
Goodman, Bonner, Wright, Hugill, Howard, Danjoux, Batterham & Howell	2012	Exploratory RCT	ICU	ICU	Conference Abstract	#VALUE!	None Given
Gordon, Grimmer & Barras	2019	Systematic Review	Geriatric Medicine	Acute	Journal Article	#VALUE!	None Given
Gosselink, Neddham, & Hermans	2012	Editorial	ICU	ICU	Journal Article	#VALUE!	None Given
Graf	2006	Editorial	Geriatric Medicine	Acute	Journal Article	#VALUE!	Specialised Nursing	Specialised Nursing
Guilcher, Everall, Cadel, Li, & Kuluski	2021	Qualitative	Acute Medicine Patients, Caregivers, Providers and Decision Makers	Acute	Journal Article	#VALUE!	None Given
Guy, Lerman & Justo	2012	Non-Interventional Retrospective	Geriatric Rehabilitation	Rehabiliation/ Post Acute	Journal Article	#VALUE!	None Given
Haley, Sullivan, Granger, & Kortebein	2011	Non-Interventional Retrospective	Geriatric Rehabilitation	Rehabiliation/ Post Acute	Journal Article	#VALUE!	Medicine	Medicine
Hartley, Keating, Jeffs, Raymond & Smith	2022	Systematic Review	General Medicine	Acute	Journal Article	#VALUE!	Physiotherapy, Public Health, Physiotherapy, Medicine, Science and Engineering	Physiotherapy
Higgins, Frazier, Lennie, Rayens & Avila	2020	Non-Interventional Prospective	Major Trauma	Acute	Journal Article	#VALUE!	Nursing, Medicine	Nursing
Hoenig and Rubenstein	1991	Editorial	Geriatric Medicine	Acute	Journal Article	#VALUE!	Medicine	Medicine
Hoenig, H	1997	State-of-the-Art Review	Geriatric Rehabilitation	Rehabiliation/ Post Acute	Journal Article	#VALUE!	Medicine	Medicine
Horgan, Carr & Murphy	2019	QI- Mixed	General Medicine	Acute	Conference Abstract	#VALUE!	None Given
Husain-Qureshi & Kirkwood	2019	QI Non-Interventional	ICU	ICU	Conference Abstract	#VALUE!	None Given
Inouye, Bogardus, Baker, Leo-Summers & Cooney	2000	Editorial	All	Acute	Journal Article	#VALUE!	Medicine, Nursing	Medicine
Inouye, Wagner, Acampora, Horwitz, Cooney, Hurst & Tinetti	1993	Non-Interventional Prospective	General Medicine	Acute	Journal Article	#VALUE!	Medicine	Medicine
Johnson, Swiatek, Wang, Liu, Chung, & Chung	2019	Non-Interventional Retrospective	Surgery	Acute	Journal Article	#VALUE!	Medicine, Surgery	Medicine
Kamper, Schultz, Hasen, Andersen, Ekmann, Nygaard, Helland, Wejse, Rahbek, Noerst, Pressel, Nielsen, Finn & Suetta	2020	Protocol	Acute Medicine	Acute	Journal Article	#VALUE!	None Given
Killewich, L	2006	Editorial	Geriatric Surgery	Acute	Journal Article	#VALUE!	Medicine	Medicine
Koh, Sridaran, & Goh	2020	QI - Interventional	Orthopedics	Acute	Journal Article	#VALUE!	Nursing	Nursing
Kortebein	2009	Narrative Literature Review	All	Acute	Journal Article	#VALUE!	Medicine	Medicine
Kortebein, Bopp, Granger & Sullivan	2008	Non-Interventional Retrospective	Geriatric Rehabilitation	Rehabiliation/ Post Acute	Journal Article	#VALUE!	Medicine	Medicine
Kovar, Carmichael, Jones, & Nichols Robsinson	2020	Non-Interventional Prospective	Elective Surgery	Acute	Conference Abstract	#VALUE!	Medicine	Medicine
Krumholz	2013	Editorial	All	Acute	Journal Article	#VALUE!	Medicine	Medicine
Laneuville, Rocheleau, Chan Chun, Pelchat & Trudel	2021	Non-Interventional Prospective	Inpatient Rehabilitation	Rehabiliation/ Post Acute	Journal Article	#VALUE!	None Given
Latronico	2015	Published Conference Materials	ICU	ICU	Conference Abstract	#VALUE!	None Given
Lim, Doshi, Castasus, Lim & Mamun	2006	Non-Interventional Retrospective	Geriatric Medicine	Acute	Journal Article	#VALUE!	Medicine	Medicine
Manning, Keller & Frank	2009	Non-Interventional Cross Sectional	General Medicine Registered Nurses	Acute	Journal Article	#VALUE!	Medicine, Nursing	Medicine
McInerney, McCarthy, McCullagh, Fox & Timmons	2018	Qualitative	Geriatric Medicine	Acute	Conference Abstract	#VALUE!	None Given
Mendez-Tellez, Pedro, Nusr, Feldman & Needham	2012	Editorial	Neurology ICU	ICU	Journal Article	#VALUE!	Medicine	Medicine
Ng, Jung, Tay, Bok, Chiong & Lim	2007	Non-Interventional Prospective	Inpatient Rehabilitation	Rehabiliation/ Post Acute	Journal Article	#VALUE!	Medicine	Medicine
Norheim, Bautmans & Kjaer	2017	Non-Interventional Prospective	Geriatric Medicine	Acute	Journal Article	#VALUE!	None Given
O'Sullivan & Cleffken	2018	QI - Interventional	ICU	ICU	Conference Abstract	#VALUE!	None Given
Pack, Miwa, Engleman, Lagu, Visintainer, Lindenauer & Woodbury	2016	QI - Interventional	Cardiac Surgery	Acute	Conference Abstract	#VALUE!	None Given
Parksinon	2019	QI - Interventional	Orthopedics	Acute	Conference Abstract	#VALUE!	None Given
Petrucci, Ricotti, Monteleone, Ferriero, Giromini, Guillace, Ambrosini, & Dalla Toffola	2018	Non-Interventional Prospective	Geriatric Surgery	Acute	Journal Article	#VALUE!	None Given
Rader, M & Vaughen, J.	1994	Editorial	Orthopedics	Acute	Journal Article	#VALUE!	Physiotherapy, Occupational Therapy, Medicine	Physical Therapy
Raj, Munir, Ball, & Carr	2007	Interventional - Evaluation	General Medicine	Rehabiliation/ Post Acute	Journal Article	#VALUE!	Medicine	Medicine
Ritchie, Wood, Martin & Jones	2017	QI- Mixed	Geriatric Medicine Nursing Assistants	Acute and Post Acute	Journal Article	#VALUE!	Physiotherapy, Occupational Therapy, Medicine	Physiotherapy
Rogerson & Kendall	2019	QI Non-Interventional	Geriatric Medicine	Acute	Conference Abstract	#VALUE!	None Given
Sanchez-Rodriguez, Marco, Miralles, Fayos, Mojal, Alvardo, Vazquez-Ibar, Escalada & Muniesa	2014	Non-Interventional Prospective	Subacute Geriatric Rehabilitation	Rehabiliation/ Post Acute	Journal Article	#VALUE!	None Given
Sayer, Whiteaway, Dawson, Simpson & Chu	2021	QI - Interventional	Geriatric Medicine	Acute	Conference Abstract	#VALUE!	None Given
Schweickert & Kress	2011	Narrative Literature Review	ICU	ICU	Journal Article	#VALUE!	Medicine	Medicine
Siebens, Aronow, Edwards, & Ghasemi	2000	RCT	Medicine and Surgery	Acute	Journal Article	#VALUE!	Medicine, Surgery, Physical Therapy	Medicine
Siegler, E. L., Stineman, M. G. & Maislin, G.	1994	Non-Interventional Retrospective	Inpatient Rehabilitation	Rehabiliation/ Post Acute	Journal Article	#VALUE!	Medicine	Medicine
Silveira, Pez, Nogueira, Furlan & Colombo	2013	Non-Interventional Prospective	ICU	ICU	Conference Abstract	#VALUE!	Physiotherapy, Occupational Therapy	Physiotherapy
Silver & Siebens	1994	Editorial	Surgery	Acute	Journal Article	#VALUE!	Medicine	Medicine
Small, Tasneem, Bagheri, Chodosh, Adelsheimer, Sutera & Moroz	2020	Interventional - Feasibility	General Medicine	Acute	Conference Abstract	#VALUE!	Medicine, Physical Therapy	Medicine
Smtih, Sreekanta, Walkeden, Penhale & Hanson	2020	Systematic Review	Inpatient Rehabilitation	Rehabiliation/ Post Acute	Journal Article	#VALUE!	Medicine, Physiotherapy	Medicine
Soares, Nucci & Silva	2012	Exploratory RCT	Surgery	Acute	Conference Abstract	#VALUE!	Physiotherapy, Occupational Therapy	Physiotherapy
Sottile, Quan, McNulty, Gray, Higgins & Moss	2014	Non-Interventional Prospective	ICU	ICU	Conference Abstract	#VALUE!	None Given
Spencer, J., Hersch, G., Eschenfelder, V., Fournet, J. & Murray-Gerzik, M.	1999	Qualitative	Transitional Unit	Rehabiliation/ Post Acute	Journal Article	#VALUE!	Occupational Therapy	Occupational Therapy
Stapley, Colley & Richards	2018	QI - Interventional	Geriatric Medicine	Acute	Conference Abstract	#VALUE!	None Given
Suriyaarachchi, Chu, Bishop, Thew, Matthews, Cowan, Gunawardene & Duque	2020	QI - Interventional	Virtual Rehabilitation Beds	Rehabiliation/ Post Acute	Journal Article	#VALUE!	Medicine, Physical Therapy, Occupational Therapy, Social Work, Advanced Clinical Practice	Medicine
Swinnerton & Price	2023	Editorial	Geriatric Medicine	Acute	Journal Article	#VALUE!	Advanced care practitioner	Advanced Care Practitioner
Timmer, Unsworth & Browne	2019	RCT	Geriatric Rehabilitation	Rehabiliation/ Post Acute	Journal Article	#VALUE!	Occupational Therapy	Occupational Therapy
Timmer, Unsworth & Taylor	2014	Systematic Review	Geriatric Rehabilitation	Rehabiliation/ Post Acute	Journal Article	#VALUE!	Occupational Therapy	Occupational Therapy
Timmer, Unsworth & Taylor	2015	Delpi	Geriatric Rehabilitation Occupational Therapists	Rehabiliation/ Post Acute	Journal Article	#VALUE!	Occupational Therapy	Occupational Therapy
Timmer, Unsworth, & Browne	2019	Protocol	Geriatric Rehabilitation	Rehabiliation/ Post Acute	Journal Article	#VALUE!	Occupational Therapy	Occupational Therapy
Unsworth & Eyres	2005	Pilot RCT	Surgery	Acute	Journal Article	#VALUE!	Occupational Therapy	Occupational Therapy
Vargo, Wilson, Fuentes & Eliam	2012	Non-Interventional Retrospective	Inpatient Rehabilitation	Rehabiliation/ Post Acute	Conference Abstract	#VALUE!	Medicine	Medicine
Venturelli, Crisafulli, Antoni, Trianni & Clini	2011	State-of-the-Art Review	ICU	ICU	Journal Article	#VALUE!	None Given
Wakabayashi & Sakuma	2014	Editorial	Geriatric Rehabilitation	Rehabiliation/ Post Acute	Journal Article	#VALUE!	Medicine	Medicine
Wakabayashi & Sashika	2014	Non-Interventional Prospective	Geriatric Rehabilitation	Rehabiliation/ Post Acute	Journal Article	#VALUE!	Medicine	Medicine
Yoshimura, Wakabayashi, Bise & Tanoue,	2018	Non-Interventional Cross Sectional	Convalescent Rehabilitation	Rehabiliation/ Post Acute	Journal Article	#VALUE!	None Given
Sourdet, Lafont, Rolland, Nourhashemi, Andrieu & Vellas	2015	Non-Interventional Cross Sectional	Geriatric Medicine	Acute	Journal Article	#VALUE!	Medicine	Medicine
Wai, Lu, Gill, Henderson and Auais	2024	QI - Interventional	General Medicine	Acute	Journal Article	#VALUE!	None Given
Urquiza, Fernandex, Arrinda, Espin, Garcia-Garcia, Rodriguez-Larrad and Irazusta	2024	Observational - Retrospective	Orthogeriatric Rehabilitation	Rehabiliation/ Post Acute	Journal Article	#VALUE!	Physiotherapy, Medicine	Physiotherapy
Pavon, Sloane, Pieper, Colon-Emeric, Cohen, Gallagher, Hall, Morey, McCarty and Hastings	2020	Observational - Prospective	General Medicine	Acute	Journal Article	#VALUE!	Medicine, Public Health, Health Sciences, Arts	Medicine
Ortiz-Alonso, Bustamante-Ara, Valenzuela, Vidan-Astiz, Rodriguez-Romo, Mayordomo-Cava, Javier-Gonzalez, Hidalgo-Gamarra, Lopez-Tatis, Valades-Malagon, Santos-Lozano, Lucia, and Serra-Rexach	2020	Interventional - RCT	Geriatric Medicine	Acute	Journal Article	#VALUE!	Medicine, Sports Nurtition, Biological Scientists	Medicine

## Sheet: Descriptions of HAD
Authors	Source type	Population	Care Focus	Description of HAD identified, where given	Alternative names for HAD/ known as
Siegler, E. L., Stineman, M. G. & Maislin, G.	Non-Interventional Retrospective	Inpatient Rehabilitation	Rehabiliation/ Post Acute	None Given	none given
Hoenig, H	State-of-the-Art Review	Geriatric Rehabilitation	Rehabiliation/ Post Acute	"Deconditioning occurs with a decrease in activity level for any reason; results include, osteoporosis, loss of muscle strength (especially lower extremity) and flexibility." p1376	none given
Conlin Shaw, M	Editorial	All	Acute	“Deconditioning, the multiple changes in organ system physiology that are induced by inactivity and reversed by activity in common in elderly persons and occurs with bed rest” p 318	none
Rader, M & Vaughen, J.	Editorial	Orthopedics	Acute	"deconditioning, which results in a state of reduced Functional capacity of a body system or systems, should be considered as a separate condition from the original illness or disease process” p s61	Immobilisation syndrome, disuse syndrome
Timmer, Unsworth & Browne	RCT	Geriatric Rehabilitation	Rehabiliation/ Post Acute	None Given	decline in function
Spencer, J., Hersch, G., Eschenfelder, V., Fournet, J. & Murray-Gerzik, M.	Qualitative	Transitional Unit	Rehabiliation/ Post Acute	"Deconditioning, which has been defined as "the physiologic changes occuring with bed rest or inactivity" P 159	none given
Deshpande, MacNeill, Lichtenberg, Pithadia & Velez	Non-Interventional Retrospective	Geriatric Rehabilitation	Rehabiliation/ Post Acute	None Given	none given
Unsworth & Eyres	Pilot RCT	Surgery	Acute	"The multiple changes in organ system physiology that are induced by inactivity and reversed by activity" p219 Acute = changed occuring within days to weeks of a sudden decrease in activity independent of disease	none given
Killewich, L	Editorial	Geriatric Surgery	Acute	The multiple changes in organ system physiology that are induced by inactivity and reversed by activity. The types of changes depend on earlier fittness level and degree of superimposed inactivity" p736 "Physiologic Functional capacity" - ability to perform tasks of daily life and the ease with which these tasks can be performed	Functional decline, Reduced "Physiologic Functional capacity"
Lim, Doshi, Castasus, Lim & Mamun	Non-Interventional Retrospective	Geriatric Medicine	Acute	"loss of function and independence" p 30	none given
Aizen, Shugaev & Lenger	Non-Interventional Retrospective	Geriatric Rehabilitation	Rehabiliation/ Post Acute	None Given - all rehab patients Noccupational therapists, admitted for stroke or hip fracture	none given
De Morton, Keating & Jeffs	Systematic Review	General Medicine	Acute	None Given	Functional decline (deterioration in physical or cognitive function)
Raj, Munir, Ball, & Carr	Interventional - Evaluation	General Medicine	Rehabiliation/ Post Acute	1 or more of the following: Physical, emotional, cogntive, and social conditions that interfere with their independence and quality of life "Generalized weakness/debility as documented in the chart" p128	none given
Silver & Siebens	Editorial	Surgery	Acute	None Given	Functional decline
Ng, Jung, Tay, Bok, Chiong & Lim	Non-Interventional Prospective	Inpatient Rehabilitation	Rehabiliation/ Post Acute	"The prescence of deconditioning was also clinically diagnosed by managing team consensus, as no standardised clinical or laboratory criteria exists" p5	none given
Bailey, Miller, Russell & Clemmer.	Editorial	ICU	ICU	"The resulting deconditioning can be independent of the primary disease process and cause physical debility when patients attempt to resume activities of daily living" 19 (check page number	none given
Baztan, Galvez, Cesar, & Socorro	Non-Interventional Prospective	Geriatric Medicine	Rehabiliation/ Post Acute	"The appearance of Functional deterioration after the patient in hospitalized may be a consequence of directly disabling pathologies such as stroke or hip fracture, but may also be derived from multiple factors associated to hospitalization that interact in elderly patients with manifest or underlying frailty coming in for different medical or surgical conditions, something that has been called '…	Functional deterioration, Immobility syndrome
Belavy, Miokovic, Armbrecht, Richardson, Rittweger & Felsenberg	Non-Interventional Prospective	Research	Other	None Given	none given
Kortebein	Narrative Literature Review	All	Acute	"a significant decline in Functional ability that is unrelated to a specific neurological or orthopedic insult. This generalized Functional decline is frequently, albeit inconsistently, termed deconditioning" "two meanings a loss of physical fitness due to failure to maintain an optimal level of physical activity or training" "the multiple changes in organ system physiology that are induced by in…	Functional decline, debility, muscle wasting/disuse atrophy*, asthenia, malaise/fatigue, generalised weakness*, *=considered most appropirate alt terminology
Manning, Keller & Frank	Non-Interventional Cross Sectional	General Medicine	Acute	"Hospitalized patients are often debilitated, either from their admitting illness or from the deconditioning that occurs with inactivity" p 252	debility, Functional decline
Venturelli, Crisafulli, Antoni, Trianni & Clini	State-of-the-Art Review	ICU	ICU	"a prolonged stay in hospital and the difficult response to medications can often cause severe complications in these patients for muscle weakness, physical deconditioning, recurrent symptoms, mood alterations, and poor quality of life"	none given
Schweickert & Kress	Narrative Literature Review	ICU	ICU	None Given	none given
Dennis, Johnson, Roberson, Heif, Bopp, Garner, Padala, Padala, Dubbert & Sullivan	Non-Interventional Prospective	Recuperation and Recovery Ward	Rehabiliation/ Post Acute	None Given	Functional decline
Goodman, Bonner, Wright, Hugill, Howard, Danjoux, Batterham & Howell	Exploratory RCT	ICU	ICU	None Given	none given
Gosselink, Neddham, & Hermans	Editorial	ICU	ICU	None Given - talks about ICU AW "… prevention and treatment of deconditioning (muscle weakness, joint stiffness, impaired Functional exercise capacity, physical inactivity." p 537	none given
Guy, Lerman & Justo	Non-Interventional Retrospective	Geriatric Rehabilitation	Rehabiliation/ Post Acute	"Hospitalized elderly patients often experience a decrease in muscle mass related to bed rest and acute illness which might be associated with deconditioning, i.e. Functional and mobility decline" "Decrease in mobility and/or activity due to acute illness and/or bed restriction, but Noccupational therapists, including patients with bone fractures, patients following orthopedic proceedures, and pa…	none given
Mendez-Tellez, Pedro, Nusr, Feldman & Needham	Editorial	Neurology ICU	ICU	" The etiology of ICUAW is multifactorial and may include (1) prolonged bed rest and immobility leading to deconditioning and disuse atrophy, (2) criticial illness polyneuropathy (CIP), critical illness myopathy (CIM), known as critical illness neuromyopathy (CINM), or (3) prolonged neuromuscular blockade. p97	disuse atrophy
Soares, Nucci & Silva	Exploratory RCT	Surgery	Acute	None Given	none given
Vargo, Wilson, Fuentes & Eliam	Non-Interventional Retrospective	Inpatient Rehabilitation	Rehabiliation/ Post Acute	None Given	none given
Cabilan, Hines & Munday	Systematic Review	Surgical Prehabilitation	Other	None Given	physical functionality
Doherty-King & Bowers	Secondary Analysis	Medicine and Surgery	Acute	Functional decline in defined as a loss in ability to perform usual activites of daily living including a loss in ability to ambulate. - no further, unable to findp 2 "deconditioning effects of bed rest are one of the most predictable causes of loss of indpendent ambuatlion in hospitalized older persons" p1 self gen.	none given
Drolet, Dejuilio, Harkless, Henricks, Kamin, Leddy, Lloyd, Waters & Williams	QI- Mixed	ICU and Intermediate Care	ICU	"physical inactivity associated with hospital care for a range of medical conditions can have many unfavourable consequences. They include nueromuscular dysfunction, metabolic disturbances, and orther organ system abnormalities that add to disease burden"	physical inactivity associated with hospital care for a range of medical conditons
Engel, Tatebe, Alonzo, Mustille & Rivera	QI- Mixed	Medical and Surgical ICU	ICU	None Given	none given
Friedman, Mayer, Hoyer & Atanelov	QI- Mixed	General Medicine	Acute	None Given	none given
Silveira, Pez, Nogueira, Furlan & Colombo	Non-Interventional Prospective	ICU	ICU	None Given	none given
Timmer, Unsworth & Taylor	Systematic Review	Geriatric Rehabilitation	Rehabiliation/ Post Acute	"One of these detrimental effects is deconditioning, a complex process of physioloigical change that can affect multiple systems within the body and often results in Functional decline" p1079	Functional decline
Sottile, Quan, McNulty, Gray, Higgins & Moss	Non-Interventional Prospective	ICU	ICU	"Intensive care associated weakness (ICU-AW) includes a spectrum of weakness from deconditioning to critical illness polyneuropathy and myopathy"	none given
Wakabayashi & Sakuma	Editorial	Geriatric Rehabilitation	Rehabiliation/ Post Acute	"Hospital associated deconditioning is characterized by the Functional decline that occurs during acute hospitalization due to illness or injury, or both, and is unrelated to a specific neurological or orthopedic insult, or both."	Debility, Disuse syndrome, hospitalisation associated disability, hospital associated deconditioning, Post hospital syndrome,
Wakabayashi & Sashika	Non-Interventional Prospective	Geriatric Rehabilitation	Rehabiliation/ Post Acute	"Hospital associated deconditioning is characterized by the Functional decline that occurs during acute hospitalization due to illness, injury, and unrelated to a specific neurological and/or orthopedic insult" AC - Functional decline that occurs during hospital admission due to BMI in normal range or those who are underweight	disuse atrophy same as activity related sarcopenia in HAD.
Falvey, Mangione & Stevens-Lapsley	Editorial	Geriatric Medicine	Acute	"… older adults with marked deficits in physical function secondary to an acute hospitalization" p1 "This decline in function during acute hospitalization has been labelled as a partially avoidable physical dependence occurring over the course of care, or, more strikingly, as iatrogenic disability. Taken together, this multi-system decline in function has been described as part of a clinical sequ…	Medical deconditioning, hospital-associated deconditioning, post hospital syndrome, hospital-acquired phenotype of frailty
Latronico	Published Conference Materials	ICU	ICU	"The ICU-acquired weakness (ICUAW), initially defined as ICU-acquired paresis, is a clinically detected syndrome in critically ill patients in whoms there is no plausible cause other than critical illness.	none given
Timmer, Unsworth & Taylor	Delpi	Geriatric Rehabilitation	Rehabiliation/ Post Acute	"Deconditioning causes physiological changes in the body such as reduced muscle strength. However, it is the resulting Functional decline that may be the most problematic for older adults with an acute illness…" p 42	none given
Artaza, Valera, San Juan, Urien, Fernandez & Malafarina	Non-Interventional Prospective	Functional Recovery Unit	Rehabiliation/ Post Acute	None Given	none given
Booth, Rivet, Flici, Harvey, Hamill, Hundley, Holland, Hubbard, Trivedi & Collier	QI- Mixed	Neurotrauma ICU	ICU	"deconditioning occurs rapidly, worsens in severity with bed rest, and places hospitalized patients at increased risk of the poor outcomes associated with immobility" p 284	none given
Fisher, Graham, Krishnana & Ottenbacher	Non-Interventional Retrospective	Geriatric Rehabilitation	Rehabiliation/ Post Acute	"In general, they have medically complex conditions and have had prolonged, complicated hospital stays. The resultant debility has been labelled acute "hospital-associated deconditioning" which involved a distinct pathway of Functional decline and decreased independence in activities of daily living" p63	debility
Galloway, Karmarkar, Graham, Tan, Raji, Granger & Ottenbacher	Non-Interventional Retrospective	Inpatient Rehabilitation	Rehabiliation/ Post Acute	"Debility, also known as deconditioning, involves a decline in Functional mobility or activities or daily living, or both" " Debility as an admission diagnosis is defined as generalized deconditioning not attributable to any other Centres for Medicare & Medicaid Services (CMS) rehabilitation impairment groups, such as stroke or orthopedic conditions"	debility
Pack, Miwa, Engleman, Lagu, Visintainer, Lindenauer & Woodbury	QI - Interventional	Cardiac Surgery	Acute	None Given	none given
Corcoran, Gavaghan, Lyons & Moloney	QI - Interventional	Geriatric Medicine	Acute	None Given	none given
Norheim, Bautmans & Kjaer	Non-Interventional Prospective	Geriatric Medicine	Acute	"Hospital associated deconditioning due to a combination of illness and inactivity is a serious problem for elderly adults. …the systemic level of the inflammatory biomarker C-reactive protien (CRP) is predictive of both length of hospital stay and readmission rates."	none given
Ritchie, Wood, Martin & Jones	QI- Mixed	Geriatric Medicine	Acute	"Hospital-associated deconditioning is defined as a significant decline in Functional abilities developed through acute and prolonged exposure to a medical care facility environment, and is independent of that attributed to primary pathologies resulting in acute admission" p425	none given
Burkhardt & Parigger	Non-Interventional Cross Sectional	Geriatric Early Rehabilitation	Rehabiliation/ Post Acute	None Given	none given
Churilov, Churilov, Maclsaac & Ekinci	Systematic Review	Inpatient Rehabilitation	Rehabiliation/ Post Acute	None Given	none given. HAD as a cause of sarcopenia?
Donnelly, Jevons and Wentworth	QI - Interventional	Geriatric Rehabilitation	Rehabiliation/ Post Acute	None Given	none given
McInerney, McCarthy, McCullagh, Fox & Timmons	Qualitative	Geriatric Medicine	Acute	"older people often experince Functional decline in hospital due to factors including immobilisation and deconditioning"	none given - deconditioning as contributer to Functional decline
O'Sullivan & Cleffken	QI - Interventional	ICU	ICU	"There are numerous negative side effects associated with an ICU stay, which include immobility, deconditioning and weakness" p 199	none given
Petrucci, Ricotti, Monteleone, Ferriero, Giromini, Guillace, Ambrosini, & Dalla Toffola	Non-Interventional Prospective	Geriatric Surgery	Acute	Based on PDSS	none given
Stapley, Colley & Richards	QI - Interventional	Geriatric Medicine	Acute	None Given	none given
Yoshimura, Wakabayashi, Bise & Tanoue,	Non-Interventional Cross Sectional	Convalescent Rehabilitation	Rehabiliation/ Post Acute	"Hospital-associated deconditioning is unrelated to orthopedic or neurological diseases and was characterized by the Functional decline that occurs during acute hospitalization due to injury, illness or both." p2	Functional decline
Churilov, Churilov, Brock, Murphy, Macisaac, & Ekinci	Non-Interventional Cross Sectional	Inpatient Rehabilitation	Rehabiliation/ Post Acute	None Given	"other"
Dirkes & Kozlowski	Editorial	ICU	ICU	"In older adults, physical inactivity during hospitalization is almost and accepted part of the inpatient experience yet contibutes to a host of negative outcomes, including a reduced ability to perform activities of daily living, an increased incidence of readmission and institutionalization" p34	Functional decline
Gordon, Grimmer & Barras	Systematic Review	Geriatric Medicine	Acute	"deconditioning is "a complex process of physiological change following a period of inactivity, bedrest or sedentary lifestyle" Pg 397. "declines in muscle strength, muscle mass, cognitive function, muscle protein synthesis and physical function" pg 398 "loss of mobility (stairs, footpaths) and inability to undertaken activities of daily living (such as sit-to-stand, moving around and cutting toe…	none given
Horgan, Carr & Murphy	QI- Mixed	General Medicine	Acute	"unnecessary bed rest results in a loss of mobility and an increased length of hospital stay"	Functional decline
Husain-Qureshi & Kirkwood	QI Non-Interventional	ICU	ICU	"physical deconditioning is common in critical care patients resulting in a long rehabilitation process" pg 74	none given
Johnson, Swiatek, Wang, Liu, Chung, & Chung	Non-Interventional Retrospective	Surgery	Acute	"Krumholz coined the term posthospital syndrome (PHS) to identify this "acquired, transient period of vulnerability" in which patients have Functional decline related to acute hospitalization" pg 52 In addition to the illness requiring medical attention, hospital admissions result in sleep deprivation, malnourishment, polypharmacy (notably narcotics), immobility, cognitive and physical deconditio…	post hospital syndrome state of frailty
Parksinon	QI - Interventional	Orthopedics	Acute	None Given	none given
Rogerson & Kendall	QI Non-Interventional	Geriatric Medicine	Acute	None Given	pyjama paralysis
Timmer, Unsworth, & Browne	Protocol	Geriatric Rehabilitation	Rehabiliation/ Post Acute	"acute hospitalisation is often associated with adverse consequences despite successful management of the medical problem" "Deconditioning, sometimes referred to as debility, is a complex process of physiological change that can affect multiple systems within the body" pg 137	none given
Asif, Taube, Sivarajah, Tsironis & Koizia	QI- Mixed	Surgery	Acute	None Given	none given
Bono & Reyes	QI Non-Interventional	Medicine and Surgery	Acute	None Given	hospital acquired disability
Higgins, Frazier, Lennie, Rayens & Avila	Non-Interventional Prospective	Major Trauma	Acute	"traumatic injuries and their management often result in reduction in or loss of mobility, which can lead to skeletal muscle deconditioning and degradation and ultimately, sustained disability" pg 527.	none given
Kamper, Schultz, Hasen, Andersen, Ekmann, Nygaard, Helland, Wejse, Rahbek, Noerst, Pressel, Nielsen, Finn & Suetta	Protocol	Acute Medicine	Acute	None Given	Functional decline
Koh, Sridaran, & Goh	QI - Interventional	Orthopedics	Acute	"Folllowing an extended period of inactivity during hospitalization, patients frequently experince hospital acquired deconditioning. Elderly patients experince declines in self-care abilities postdischarge" p 258	Functional decline
Kovar, Carmichael, Jones, & Nichols Robsinson	Non-Interventional Prospective	Elective Surgery	Acute	None Given	none given
Small, Tasneem, Bagheri, Chodosh, Adelsheimer, Sutera & Moroz	Interventional - Feasibility	General Medicine	Acute	"Deconditioning from prolonged bedrest during hospitalization predisposes older patients to loss of mobility and the need for additional rehabilitation post-discharge" pg S134	none given
Smtih, Sreekanta, Walkeden, Penhale & Hanson	Systematic Review	Inpatient Rehabilitation	Rehabiliation/ Post Acute	"Hospital-associated deconditioning (HAD) is a complex negative consequence following hospitalisation. It is associated with prolonged periods of immobility. The cumulative impact of extended or complicated hospitalisation among older adults typically results in patients experiencing a decrease in muscle mass and signifcant Functional decline due to a complex process of physiological changes that…	Functional decline
Suriyaarachchi, Chu, Bishop, Thew, Matthews, Cowan, Gunawardene & Duque	QI - Interventional	Virtual Rehabilitation Beds	Rehabiliation/ Post Acute	"The term "hospital-associated deconditioning" (HAD) characterizes the Functional decline that occurs during hospitalization due to illness or injury or both and is unrelated to a specific neurological or orthopaedic insult". p172	Functional decline
Butler & Welford	QI - Interventional	Geriatric Medicine	Acute	"Prolonged bedrest amongst the elderly causes deconditioning leading to; increased hospital length of stay, additional social costs and decreased quality of life! P iI	none given
Guilcher, Everall, Cadel, Li, & Kuluski	Qualitative	Acute Medicine	Acute	"Prevenatable harm also includes hospital-associated deconditioning (HAD), also known as post-hospital syndrome or the trauma of hospitalization, which is characterized as a period of generalized risk and stress occuring while a patient is receiving care in hospital from an acute condition" p 2	Functional decline
Laneuville, Rocheleau, Chan Chun, Pelchat & Trudel	Non-Interventional Prospective	Inpatient Rehabilitation	Rehabiliation/ Post Acute	"Hospital-acquired deconditioning is defined as the Functional decline resulting from acute hospitalization and unrelated to a specific neurological or orthopedic condition" p1	Functional decline
Sayer, Whiteaway, Dawson, Simpson & Chu	QI - Interventional	Geriatric Medicine	Acute	".. Some level of deconditioning during their stay. This can lead to longer length of stays, premature admissions to care homes and loss of function while in hospital" p iI	none given
Siebens, Aronow, Edwards, & Ghasemi	RCT	Medicine and Surgery	Acute	"Deconditioning can be defined as "the multiple changes in organ system physiology that are induced by inactivity and reversed by activity". 7 pg 1545	Functional decline
Hoenig and Rubenstein	Editorial	Geriatric Medicine	Acute	"In addition to the effects of whaterver acute illness brought them to the hospital, older people frequently incur major Functional setbacks stemming from in-hospital treatment and immobilization." p 220	Functional decline
Creditor	Editorial	Geriatric Medicine	Acute	"For many, hospitalization is followed by an often irreverible decline in Functional status and a change in quality and style of life." pg 118	Functional decline Frailty
Inouye, Wagner, Acampora, Horwitz, Cooney, Hurst & Tinetti	Non-Interventional Prospective	General Medicine	Acute	"Functional decline, defined as a deterioration in self-care skills, in a common and often deveastating problem for hospitalized elderly patients." p 645	Functional decline
Inouye, Bogardus, Baker, Leo-Summers & Cooney	Editorial	All	Acute	"Functional decline, defined as a decrement in physical and/or cognitive Functional , is the leading complication of hospitalization for older patients." p 1697	Functional decline
Brown, Friedkin & Inouye	Non-Interventional Prospective	General Medicine	Acute	None Given	Functional decline
Brown, Rothe, Peel, & Allman	Non-Interventional Prospective	All	Acute	"Functional decline, defined as loss of the ability to care for oneself, commonly occurs during hospitalization, being experienced by up to 65% of older adults", p277	Functional decline
Graf	Editorial	Geriatric Medicine	Acute	"Deconditioning is the term used to describe the decrease in muscle mass and other physiologic changes that result from either ageing or immobility or both and contribute to overall weakness. Functional decline is the consequence of those physiologic changes - the resulting inability to perform activities that ensure a person's independence, such as rising unaided from a chair." p60	Functional decline
Kortebein, Bopp, Granger & Sullivan	Non-Interventional Retrospective	Geriatric Rehabilitation	Rehabiliation/ Post Acute	"Clinically, this decrement in function associated with hospitalization is commonly termed debilityor deconditioning, although there are no distinct diagnostic criteria for either of these conditionins, and they are used essentially interchangably." p 119	debility
Covinsky, Pierluissi & Johnston	Narrative Literature Review	Geriatric Medicine	Acute	"In older patients, acute medical illness that requires hospitalization is a sentinel event that often precipitates disability. This results in the subsequent inability to live independently and complete basic activities of daily living (ADLs). This hospitalization associated disability ... may be triggered even when the illness that necessitated the hospitalization is successfully treated." p1782	shares many characteristics with other hospital acquired issues therefore termed: Hospitalization disability syndrome
Haley, Sullivan, Granger, & Kortebein	Non-Interventional Retrospective	Geriatric Rehabilitation	Rehabiliation/ Post Acute	"Debility, (also known as deconditioning or generalized weakness)… " p 792 "…it has long been recognized that hospital-associated debility/generalized weakness (or deconditioning) is a multifactorial syndrome with contributing factors, including "specific medical condition" (i.e. the medical/surgical illness necessitating hospitalization) as well as the bed rest/inactivity, the adverse effects of…	debility, nondebility generalised weakness, muscle wasting and disuse atrophy, muscle weakness, other malaise and fatigue/asthenia
Krumholz	Editorial	All	Acute	"Patients who were recently hospititalized are not only recovering from their acute illness, but they also experince a transient period of generalized risk for a wide range of adverse health events. Thus, their condition may be better characterized as a post-hospital syndrome, an acquired condtion of vulnerability." p1	post hospital syndrome
Sanchez-Rodriguez, Marco, Miralles, Fayos, Mojal, Alvardo, Vazquez-Ibar, Escalada & Muniesa	Non-Interventional Prospective	Subacute Geriatric Rehabilitation	Rehabiliation/ Post Acute	"patients with sarcopenia have greater disability and Functional dependence compare to their peers without the condition" p 39 "Eldery patients admitted to a subacute geriatric care unit have recently suffered and acute experince, generally have high co-morbidity and medical complexity...At this level of hospital care, patients have Functional limitations secondary to an acute medical or surgical…	Functional decline
Chastin, Harvey, Dall, McInally, Mavroeidi & Skelton	Editorial	All	Acute	None Given	post hospital syndrome
Hartley, Keating, Jeffs, Raymond & Smith	Systematic Review	General Medicine	Acute	"Older adults often experience a reduction in Functional ability during acute illness or hospitalisation . The degree of loss of function is thought to be dependent on pre-existing physical and cognitive frailty and the severity of the illness . It is suggested that for people admitted to hospital, hospital care itself may impede Functional recovery or even lead to further loss of function . Term…	Hospital associated deconditioning, hospital associated Functional decline
Swinnerton & Price	Editorial	Geriatric Medicine	Acute	"The risks associated with hospitalisation and acute illness, particularly among older people, are well-documented. One such risk is deconditioning, which can be defined as a decrease in muscle mass caused by complex physiological changes occurring as a result of prolonged immobility and leading to significant Functional decline." p35 "Deconditioning is a decrease in muscle mass and overall funct…	Hospital associated Functional decline
Beam, Gorman, Kist, Giles, Kiser & Dumire	QI - Interventional	Medical and Surgical	Acute	"Elderly patients are at substantial risk of functional decline, adverse health outcomes, and prolonged hospital stays due to unnecessary immobilization during hospitalization [1]. Patients, age 65 and older, spend most of their hospital stay in bed instead of walking or being out of bed (OOB) [2]. As a result, muscle loss, venous thromboembolism, pressure injuries, orthostatic hypotension, loss …	Functional decline
Beisheim-Ryan, Butera, Hinrichs, Derlein, Malong, Holtrop, Forster, Diedrich, Gustavson, & Stevens-Lapsley	Protocol	Skilled nursing facilities	Rehabiliation/ Post Acute	None given	hospital associated functional deficits
Sourdet, Lafont, Rolland, Nourhashemi, Andrieu & Vellas	Non-Interventional Cross Sectional	Geriatric Medicine	Acute	None given	Hospitalisation-associated disability (Hospitalization-associated disability was defined as a loss of 0.5 points or more on the total Katz ADL score between admission and discharge), decline in functional status, Iatrogenic disability We defined iatrogenic disability (ID) as the functional consequence of 1 or several IAEs occurring during hospitalization. An IAE may be any unintended injury or co…
Wai, Lu, Gill, Henderson and Auais	QI - Interventional	General Medicine	Acute	Physiological deconditioning, also referred to as pajamas (PJ) paralysis, describes the adverse physical and psychological effects experienced by patients who spend lengthy periods immobile and lying in bed, often in hospital pajamas or gowns, during hospital admission [1,2]. P1 HAD is defined as a new or additional disability in activities of daily living (ADL) that develops during admission [6–…	Physiological Deconditioning, PJ Paralysis, Hospital-acquired Disability
Urquiza, Fernandex, Arrinda, Espin, Garcia-Garcia, Rodriguez-Larrad and Irazusta	Observational - Retrospective	Orthogeriatric Rehabilitation	Rehabiliation/ Post Acute	Inaddition, asignificant number of older adults experience functional decline during acute hospitalization intheabsence ofnewly disabling orthopedicorneurologic diagnoses.4 These patients arecommonly termed ashaving hospital-associated deconditioning (HAD).	Hospital-associated Deconditioning
Pavon, Sloane, Pieper, Colon-Emeric, Cohen, Gallagher, Hall, Morey, McCarty and Hastings	Observational - Prospective	General Medicine	Acute	Hospital-acquired disability (HAD), functional loss acquired during hospitalization, is common; and a key contributor to this process is immobility.1,2	Hospital-acquired disability
Ortiz-Alonso, Bustamante-Ara, Valenzuela, Vidan-Astiz, Rodriguez-Romo, Mayordomo-Cava, Javier-Gonzalez, Hidalgo-Gamarra, Lopez-Tatis, Valades-Malagon, Santos-Lozano, Lucia, and Serra-Rexach	Interventional - RCT	Geriatric Medicine	Acute	Hospitalization-associated disability [HAD, ie, loss of the ability to perform one or more basic activities of daily living (ADLs) independently at discharge] occurs in more than one-third of hospitalized older adults.	Hospital-acquired disability, functional decline

## Sheet: Clinical Presentations
Authors	Population	Care Focus	cause(s)	physiological changes	assessment/diagnostic criteria	Criteria used?	contributory factors - big picture
Siegler, E. L., Stineman, M. G. & Maislin, G.	Inpatient Rehabilitation	Rehabiliation/ Post Acute	none given	none given	none given		none given
Hoenig, H	Geriatric Rehabilitation	Rehabiliation/ Post Acute	decreased level of activity for any reason	none given	none given		Balance of participation versus secondary limitations Interventions chosen aren’t always straightforward eg giving a mobility scooter for difficulty walking may promote deconditioning
Conlin Shaw, M	All	Acute	inactivity - bed rest	Decreased cardiac reserve Bone loss Orthostatic hypotension	none given	? Pressure ulcer staging	putting patients to bed as a traditional approach to care - inactivity, isolation and development of associated complications
Rader, M & Vaughen, J.	Orthopedics	Acute	1- Acute illness necessitating bed rest as a precipitating factor 2- a disabling insult that limits or precludes mobility 3- a chronic disease that results in gradual decline in activity eg arthritis, CHF, emphysema 4- medications that post iatrogenic risk eg sedatives 5- changes in psychological state 6- changes in social circumstance	Deconditioning process associated with neurohormonal mechanisms and a general decrease of body metabolic needs. Effects are cumulative and result in changes to most body systems over time	none given		Inactivity generated by: 1- operation within limited, circumscribed environment 2- Engagement in restricted anti gravity activity 3 subject to dependency on others for survival
Timmer, Unsworth & Browne	Geriatric Rehabilitation	Rehabiliation/ Post Acute	none given	none given	none given		none given
Spencer, J., Hersch, G., Eschenfelder, V., Fournet, J. & Murray-Gerzik, M.	Transitional Unit	Rehabiliation/ Post Acute	bed rest Inactivity	none given	none given		geographical, social and cultural contexts of neighbourhood and community scales Emphasis on short term Functional changes in clinic doesn’t translate well to home environments, need guidance to apply clinic generated skills Daily life circumstances - relationships, Measurability vs meaningfulness - linear relationship between Functional capacity and QoL
Deshpande, MacNeill, Lichtenberg, Pithadia & Velez	Geriatric Rehabilitation	Rehabiliation/ Post Acute	none given	none given	Deconditioning appears to be anything that’s NOT a discrete diagnosis - lax diagnostics in the words of Alison!	no criteria - compared fim scores and outcomes of one group in acute rehab and one in SNF	none given
Unsworth & Eyres	Surgery	Acute	bed rest Inactivity Lack of engagement in occupation (Chandler& Hadley 1996, Krasnoff & Painter, 1999, Oliver 1998)	none given	none specific - loss of independence in mob and ADLs	no criteria - study inclusion only	Characteristics of acute hospitals which to occupational disruption (Reduced opportunity or ability to engage in meaningful and valued occupations during an acute hospital admission) which influences: 1. general health and wellbeing. (Law, Steinwender & Lecalir, 1998, Whiteford, 2000, Wilcock 1998a 2. Person's ability to change, cope with or exert control over the environment (Siebens et al 2000,…
Killewich, L	Geriatric Surgery	Acute	Bed rest inactivity Surgical stress response - increased catabolic hormones (cortisol inc, 1.2kg loss, 2/3 in 10 days was from skeletal muscle, decreased anabolic hormones, increased cardiac work, impaired pulmonary function, pain, faigue and immunosupression.	Ageing= Loss of muscle mass, esp T2 = strength loss = sarcopenia, demineralisation and other bone changes, loss of aerobic capacity, loss of vasomotor stability and changes in resp function (11) Bed rest = negative changes in muscle (5% dec per week, up to 40% in 6/52), bone ( reabsoprtion faster than formation = 4% dec in lumbar spine, femoral head, 2% in tibia, 10% in calcaneus over 4 months), …	none given		Bed rest assocatied with hospitalisation and surgery The surgery itself and assocaiated stress response, tissue injury and metabolic changes.
Lim, Doshi, Castasus, Lim & Mamun	Geriatric Medicine	Acute	none given	none given	none given		Staying in hospital
Aizen, Shugaev & Lenger	Geriatric Rehabilitation	Rehabiliation/ Post Acute	prolonged bed rest	decreased cardiac output, decline in blood volume	none given		none given
De Morton, Keating & Jeffs	General Medicine	Acute	bed rest	Loss of muscle strength - 5% per day LL>UL Elevated HR on exertion, reduced SV, CO at max exercise	Loss of independent mobility (where mobile 2 weeks before adm)	No criteria - a cited study showed many older adults weren't able to walk at d/c when able to 2 weeks previously	Staying in hospital, commonality of bed based care
Raj, Munir, Ball, & Carr	General Medicine	Rehabiliation/ Post Acute	prolonged hospital stay	none given	1 or more of the following: Physical, emotional, cogntive, and social conditions that interfere with their independence and quality of life - self generated -55 years or older -Adm under internal medicine -25%-75% assistance with ADLs - Medically stable - Decrease in function from baseline - Two + therapists needed, physio mandatory - Can be built up to 3hrs of therapy per day - Goal to return ho…	criteria for admission to rehab service - check with ALG.	none given
Silver & Siebens	Surgery	Acute	Post operative bed rest and immobility	Physical inactivity in ageing body MSK - joint contractures, weakness (10-15% loss weekly, 3-5% daily esp quads, iliopsoas, back extensors), disuse atrophy, osteoporosis Nervous- Decreased sensory function, motor incoordination, gait and balance deficits, confusion and disorientation, depression CVS - Postural hypotension, reflex tachycardia, reduced SV, LVF and CO (develop after several days), t…	none given		none given
Ng, Jung, Tay, Bok, Chiong & Lim	Inpatient Rehabilitation	Rehabiliation/ Post Acute	none given	none given	Anything that’s Noccupational therapists, stroke, SCI, TBI, MSK conditions, cancer or pulmonary rehab	no criteria exist - clinical diagnosis	Social, cultural, ethical, political and healthcare considerations impact on rehab outcomes
Bailey, Miller, Russell & Clemmer.	ICU	ICU	critical illness ARDS Immobility Mechanical Ventilation	none given	none given		ICU culture- tradition of bed rest and postponement of PT till after ICU D/C, Personnel perceptions - tendency to maintain status quo, resistance to group change and reliquishing autonomy, percieved disproportionality of benefits to input, isuffience personal accountability for practice change, inadequte knowledge about clinical outcomes. Team work habits - fragmentation of care, structure of the…
Baztan, Galvez, Cesar, & Socorro	Geriatric Medicine	Rehabiliation/ Post Acute	none given	none given	none given		none given
Belavy, Miokovic, Armbrecht, Richardson, Rittweger & Felsenberg	Research	Other	25/3/24 - many patients with medical condiditions are presecribed bed rest or immobilised to protect healing tissues - e.g during recovery on medical wards post prolonged ICU stay, confined to bed during pregnancy	Fastest rates of atrophy seen in medial gastrocnemius and then vastii. Anti gravity muscles show more atrophy. Rec fem showed no atrophy. Plantar flexors most affected, followed by knee extensors, then hip. synergesists atrophy at different rates. Atrophy rates largely unrelated to muscle size therefore Functional , nueromuscular and histological characteristics are more important in determining …	none given		none given
Kortebein	All	Acute	acute hospitalisation Bed rest inactivity cumulative multifactorial phenomenon - infinite causes	Loss of muscle strength, maximal aerobic capacity, in sarcopenia low muscle bulk means less storage for amino acids (important for buffering acute stress and reduced nutrition) YET - healthy older adults on 10 days bed rest lost 14% LL strength and 12% aerobic capacity but had no Functional compromise on validated instruments Raised inflamatory markers	its now recognised as a distinct rehab conditiong in american PM&R -	no	Not recognised as a distinct entity in ICD 9, no MeSH heading (there is now one) Not one of the 13 diagnoses for medicare/medicaid 75% rule.
Manning, Keller & Frank	General Medicine Registered Nurses	Acute	hospitalisation inactivity	none given	use IMOVE as another vital sign - does a sudden change indicate a change in medical status	Evaluative rather than diagnostic.	deconditioning poorly documented
Venturelli, Crisafulli, Antoni, Trianni & Clini	ICU	ICU	prolonged bed rest	atalecatsis - reduced pulmonary ventilation, airway closure Dysfunction and atrophy in antigravity muscles - quads and lat dorsi, selective damage of type 2 fibers = reduced aerobic exercise capacity.	none given		none given
Schweickert & Kress	ICU	ICU	complete bed rest Hyperglycemia CIP- thrombotic, ischemic injury to neural tissue inflammatory states - sepsis, SIRS Drugs - NM blockers, steroids Malnutrition Prolonged immobility - sedative related	CIP - primary axonal degeneration, motor>sensory nerves without demyelination CIM - generalised muscle weakness but preserved sensory function , muscle fibre atrophy, vacuolization, selective loss of myosin Muscle catabolism, atrophy	CIP - nerve studies, action potential often blunted by tissue oedema changes cannot be solely attributed to immobilisation - more severe	criteria for ICU AW , deconditioning from immobility a part of pathophys of CIP and CIM	respiratory failure - life threatening = traditional, intuitive strategy to focus on physiologic stabilisation of deterioration. Sicker patients = taking over for the patient becomes the norm = complete control of ventilation, perfusion, fluid balance which needs a docile patient which means deep sedation and paralysis. Prioritisation of short term goal (survival) over long term impacts on cognit…
Dennis, Johnson, Roberson, Heif, Bopp, Garner, Padala, Padala, Dubbert & Sullivan	Recuperation and Recovery Ward	Rehabiliation/ Post Acute	Inadequate nutrient intake, systemic inflammation, low levels of physical activity	nutrition resistant lean body mass catabolism, anorexia and malaise caused by pro-inflammatory cytokines (eg IL-6, TNF-alpha). Inverse relationship noted between proinflamatory cytokines and muscle strenght/physical performance independent of disease process	Unable to Walk 15m with aid or assistance added to ax dx 24.11.22 Albumin below normal - added to ax/dx 14.09.2023	description of population ability at baseline - didn't specifically say what criteria established a study participant was admitted for deconditioning or persistant weakness	social, psychological, physiological 3
Goodman, Bonner, Wright, Hugill, Howard, Danjoux, Batterham & Howell	ICU	ICU	none given	none given	none given		none given
Gosselink, Neddham, & Hermans	ICU	ICU	Bed rest Immobility	none given	none given - tools for ICU AW	no	risk of moving the critically ill vs the risks of immobility
Guy, Lerman & Justo	Geriatric Rehabilitation	Rehabiliation/ Post Acute	Exacerbation of CHF, Pneumonia, falls Craniotomy, elective laparotomy, other infections/inflammatory diseases, peritonitis conservative rx, UTI. ACS, elective cardiothoracic surgery, acute renal failure, intracranial bleed conservative mx, elective nuero surgeries, peripheral vascular proceedures, emergency peritonitis mx with laparotomy	loss of muscle mass	none given		none given
Mendez-Tellez, Pedro, Nusr, Feldman & Needham	Neurology ICU	ICU	prolonged bed rest immobility MODS -2+ organs and number of days on vasoactive drugs Hyperglycemia Neuromuscular blockade Corticosteroids	decreased protein synthesis, increased proteolysis results in a net loss of muscle mass and strength (4-5% loss of strength per week in healthy volunteers), in critically ill its rapid and severe. Suggested that prolonged imobility contributes to increased inflamatory response. , shift from slow twitch to fast twitch muscle fibres, decreased muscle fibre size, little or no inflamatory infiltrates.	dx of ICUAW is clincal presentation, predisposing factors, clinically detectable weakness, no other plausible etiology other than critical illness	criteria for ICU AW	ICU culture - deep sedation, safety concerns, local beliefs and values, lack of staffing or expertise Patient barriers - delerium, instability, obesity
Soares, Nucci & Silva	Surgery	Acute	pain, abdominal surgery	none given	none given		none given
Vargo, Wilson, Fuentes & Eliam	Inpatient Rehabilitation	Rehabiliation/ Post Acute	none given	none given	none given		none given
Cabilan, Hines & Munday	Surgical Prehabilitation	Other	major surgery	none given	none given		none given
Doherty-King & Bowers	Medicine and Surgery Registered Nurses	Acute	Partly illness Hospital attendance Lack of ambulation Bed rest	none given	none given		Bed rest orders, role of PTs, fear of falls, back injury to themselves, tethers - catheters and IV lines, staff shortages, lack of aids, patient acuity, percieved risk and unit expectations, patient labeling
Drolet, Dejuilio, Harkless, Henricks, Kamin, Leddy, Lloyd, Waters & Williams	ICU and Intermediate Care	ICU	prolonged bed rest	skeletal muscle changes within 72 hours. Nueromuscular dysfunction, metabolic disturbances, and other organ abnormalities	none given		tradition - impression that bed rest (83% of time spent in bed, 73% considered able to walk didnt) is theraputic and physical activity is harmful in the prescence of illness, barriers = patient monitoring, life support, lack of resource, time, ease of omitting ambulation, belief activity is another professionals job, worries about falls,
Engel, Tatebe, Alonzo, Mustille & Rivera	Medical and Surgical ICU	ICU	prolonged bed rest (89% of the ICU day)	immobility + catabolic process of critical illness results in long term weakness	none given		Established practice patterns and beliefs about safety of early mobilisation Lack of mobilisation guidelines/ criteria for referral to PT Late referral to PT - end of stay and infrequent Weekly staff change Scepticism Perceived lack of evidence to mobilise Lack of resources - PT and equipment
Friedman, Mayer, Hoyer & Atanelov	General Medicine	Acute	none given	none given	none given		Lack of prior training for nurses in safe mobilisation (45%) Lack of equipment (78%) Perception of patient resistance (86%)
Silveira, Pez, Nogueira, Furlan & Colombo	ICU	ICU	none given	none given	none given		Attention directed at deconditioning
Timmer, Unsworth & Taylor	Geriatric Rehabilitation	Rehabiliation/ Post Acute	hospitalisation, prolonged bed rest	none given	Frailty criteria- ADL disability, falls hx, malnutrition, dementia, depression, incontinence, prolonged bed rest or unplanned admission (26- Cohen et al 2002)	Criteria is for Frailty	Acute care setting
Sottile, Quan, McNulty, Gray, Higgins & Moss	ICU	ICU	none given	none given	CIPNM - abnormal nerve condution + MRC <48 Normal = MRC >48 Deconditioned = normal nerve conduction + MRC <48	yes	none given
Wakabayashi & Sakuma	Geriatric Rehabilitation	Rehabiliation/ Post Acute	Sleep deprivation, disruption of circadian rhythms, poor nourishment, pain/ discomfort, medications that affect cognition and physical function, mentally challenging situations, deconditioned by bed rest or inactivity	Figure 1 - frailty; sarcopenia without disability -> insult-> catabolism from acute inflammation, undernutrition (+ insult effects, immobilisation) -> sarcopenia with disability (sarcopenic dysphagia)	primary = Age related, or secondary sarcopenia activity related, disease related or nutrition related	criteria for sarcopenia	none given
Wakabayashi & Sashika	Geriatric Rehabilitation	Rehabiliation/ Post Acute	malnutrition + inactivity	none given	(No validated criteria exist) Diagnosed by staff physiatrist - a period of inactivity or bed restriction after acute hospitalisation, a new disability to complete one of the basic ADLs (bathing, dressing, bed/chair transfer, toieting, eating or room based walking), new disability unrelated to ortho or neuro insult, bartel index under 85 (Japan policy)	yes - but again no validated criteria exist for HAD	none given
Falvey, Mangione & Stevens-Lapsley	Geriatric Medicine	Acute	Stress of hospitalisation, prolonged bed rest, relative inactivity (83% in bed, 12% in chair), disturbed sleep, nutritional deficits. Metabolic, respiratory or infectious onset	critical failure in homeostatic processes - > increased vulnerability to readmission, changes in muscle strength, mass, congitive function, muscle protein synthesis and Functional ability.	none given		Changing landscape of value driven care Undertreatment driven by therapists perceptions of safe treatment Absence of PT input into transitional care model
Latronico	ICU	ICU	Prolonged immobility ICUAW caused by CIPNM Possibly sedation and mechanical ventilation too	none given	generalised weakness not explained by other causes, unrelated to illness, documented generalised weakness - MRC under 48/60 Electrophysiological testing - CIP = axonal sensory-motor polyneuropathy, reduced amplitude of compound muscle action potentials + sensory nerve action potentials, CIM = reduced CMAP + longer, normal SNAP, reduced muscle excitability with direct stim, and myopathic motor uni…	criteria for ICU AW	none given
Timmer, Unsworth & Taylor	Geriatric Rehabilitation Occupational Therapists	Rehabiliation/ Post Acute	Inactivity Bed rest Sedentary lifestyle	none given	none given		Interaction of process of ageing, the illness itself and te adverse effects of treatment
Artaza, Valera, San Juan, Urien, Fernandez & Malafarina	Functional Recovery Unit	Rehabiliation/ Post Acute	none given	none given	none given		none given
Booth, Rivet, Flici, Harvey, Hamill, Hundley, Holland, Hubbard, Trivedi & Collier	Neurotrauma ICU	ICU	immobility	none given	none given		tradition Multispeciality care Complexity - need additional staff resources
Fisher, Graham, Krishnana & Ottenbacher	Geriatric Rehabilitation	Rehabiliation/ Post Acute	Prolonged LOS, complex LOS	none given	none given		Policy reporting change in 2014, CMS adopted all cause unplanned readmission within 30 days of D/C as a quality metric, reduced funding if higher than expected. Generalized deconditioning not part of the 13 rehab diagnoses
Galloway, Karmarkar, Graham, Tan, Raji, Granger & Ottenbacher	Inpatient Rehabilitation	Rehabiliation/ Post Acute	none given	none given	none given? - agree		none given
Pack, Miwa, Engleman, Lagu, Visintainer, Lindenauer & Woodbury	Cardiac Surgery	Acute	prolonged bed rest	none given	none given		Hospitals failing to provide enough ambulation
Corcoran, Gavaghan, Lyons & Moloney	Geriatric Medicine	Acute	Restricted habitual activity, sleep deprivation	none given	none given		lack of standardised pathways, coordination and patient focussed processes
Norheim, Bautmans & Kjaer	Geriatric Medicine	Acute	Combination of illness and inactivity	CI associated with increased LOS, reduced albumin and reduced luekocytes on admission. Also associated with a lower change in DEMMI, 30s chair stand, and all active activity Persistent inflammation not significant predictor of change in overall physical function or mobility in short term hospitalisation of older patients	none given		none given
Ritchie, Wood, Martin & Jones	Geriatric Medicine Nursing Assistants	Acute and Post Acute	Acute and prolonged exposure to hospital medical care	none given	none given		Shift in nomeclature from rehabilitation (reaquisition of function through MDT assessment and professional theraputic input in attainment of set goals) to "restorative care" (slash function focused care)(philosophy of care that encourages, enables, and motivates individuals to maintain and restore function, thereby optimizing independence, 9- Resnick 2012) p425. Custodial care = meeting ADLs with…
Burkhardt & Parigger	Geriatric Early Rehabilitation	Rehabiliation/ Post Acute	none given	none given	none given		none given
Churilov, Churilov, Maclsaac & Ekinci	Inpatient Rehabilitation	Rehabiliation/ Post Acute	none given	none given	Sanchez-Rodriguez et al in Spain 2014. - used EWGSOP (european working group on scarcopenia in older people) (BIA= bioimpedance and handgrip) to diagnose sarcopenia. Patients without neuro, hip # or amputation.	critieria is for sarcopenia, "functional" measure = hand grip + 4meter walking speed cut off 0.8m/s = low physical performance	No commonly accepted defintion of sarcopenia either
Donnelly, Jevons and Wentworth	Geriatric Rehabilitation	Rehabiliation/ Post Acute	none given	none given	none given		discrimination against cognitive frailty
McInerney, McCarthy, McCullagh, Fox & Timmons	Geriatric Medicine	Acute	none given - deconditioning contributes to Functional decline	none given	none given		Facilitaor factors, motivation, fear, self percieved level of frailty
O'Sullivan & Cleffken	ICU	ICU	none given	none given	none given		none given
Petrucci, Ricotti, Monteleone, Ferriero, Giromini, Guillace, Ambrosini, & Dalla Toffola	Geriatric Surgery	Acute	Major surgery Side effects of GA on muscle weakness, postural instability affects walking ability Prolonged bed rest	none given	Post operative physical deconditioning scale (PPDS, Monteleone et al 2015, postively predicts walking ability 95%, but negative low - only 38% with severe scores able to walk at d/c - those with no or mild likely to walk at d/c , 82% sens, 75% spec: performance based measure from neuro/ortho comorbidities, LL strength, 1 item from trunk control test = sit up from lying and maintain for at least 3…		To prevent HAD - increase in healthcare resource use. Difficult recoveries contribute to LOS and disability at D/C -> high personal and social costs
Stapley, Colley & Richards	Geriatric Medicine	Acute	link between social/ individual activities and deconditioning - future work	none given	none given		Possible loneliness and lack of access to distractions
Yoshimura, Wakabayashi, Bise & Tanoue,	Convalescent Rehabilitation	Rehabiliation/ Post Acute	acute hospitalisation	none given	none for HAD		none given
Churilov, Churilov, Brock, Murphy, Macisaac, & Ekinci	Inpatient Rehabilitation	Rehabiliation/ Post Acute	none given	none given	none given		none given
Dirkes & Kozlowski	ICU	ICU	Bed rest Acute inactivity Immobility	MSK - 1-1.5% strength loss per day on strict bed rest (Inflammation, nutritional deficiences, reduced protien synthesis, immobility), 28 days of BR = 0.4kg loss and 23% loss of leg extension power, preferentially in antigravity muscles -> impact on balance, risk of falls and reduced aerobic capacity Accelerated bone reabsorbtion -> higher risk of fracture CV- lying dow shifts 11% of blood from le…	none given		Knowledge translation gap Perception patients are "too sick" Presence of tethers Communication and care coordination issues Knowledge deficits Workload concerns Documentation burdens Safety concerns - risk of falls, patients weakness, weight, illness severity, discomfort, length of time in bed, poor vascular tone/ use of pressors, dislodgement of lines, sedation, haemodynamic instability, risk of…
Gordon, Grimmer & Barras	Geriatric Medicine	Acute	Bedrest Inactivity sedentary behaviour	only discussed in creditor summary	none given No tool assessed bone density loss or urinary incontinence (osteoporsis rejected on time taken to develop anyway) Muscle strength most commonly assessed -> mobility, balance, fitness, ADLs, walking distance, gait speed, appetite.	No - assessment points but no cut off values or scores	No standard defintion of HAD, no agreement on common elements, or assessment practices. - inhibits ability for all HCP to recognise and assess for HAD (currently instruments vary by profession and body system, inconsistent sharing practices) Increased pressure on acute beds - chronic diease, longer life spans Economic and social demand for safe, effective and efficient discharge home (therefore H…
Horgan, Carr & Murphy	General Medicine	Acute	unnecessary bed rest	none given	none given		poor application of knowledge that mobilisation prevents deconditioning
Husain-Qureshi & Kirkwood	ICU	ICU	none given - lack of rehab inferred	none given	none given		Poor communication between staff at MDT - doctor centred/ medical centred
Johnson, Swiatek, Wang, Liu, Chung, & Chung	Surgery	Acute	hospital admission - illness needing medical attention, sleep deprivation, malnourishment, polypharmacy (notably narcotics), immobility, cognitive and physical deconditioning and stress related to socioeconomic concerns Multifactorial phenomenon related to psychosocial stressors of hospital	none given	Hospitalisation in the 90 days preceeding elective care, Krumholz model = 30 day window of physical deconditioning. Dharmarajan (27) found heightened relative risk for 90 days	criteria is for post hospital syndrome. ??? Gill discharged from acute hospital below preadmission level of function	Surgical readiness - more older people are undergoing estetic procedures, most risky cosmetic surgery therefore worse outcome rates
Parksinon	Orthopedics	Acute	reduced physical activity social isolation	none given	none given		social isolation - away from families (complex surgery needs), single rooms, lack of common room. Physically inactive - ensuite rooms, meals bought to patients, no inceditve to leave rooms Positive - active and independent living program
Rogerson & Kendall	Geriatric Medicine	Acute	Lack of MDT input?	none given	Worsened mob/ transfer, requirement of increased support on d/c or rehab, ? Some element of weight loss	measured several components however not cut off values provided for dx of HAD	social admissions that would need more support regardless of MDT input due to general trend of decline
Timmer, Unsworth, & Browne	Geriatric Rehabilitation	Rehabiliation/ Post Acute	acute hospitalisation	none given	none given - admitted for reconditioning program		none given
Asif, Taube, Sivarajah, Tsironis & Koizia	Surgery	Acute	"30% of patients experience low mobility during hospital stay which in turn increases risk of developing pressure injury, falls, malnutrition, hospital infections and deconditioning"	none given	none given		ward culture, lack of knowledge
Bono & Reyes	Medicine and Surgery Registered Nurses, Patient Care Associates and Residents	Acute	bed rest	none given	none given		see survey results more work, not enough staff/ equipment knowledge gap (family resistance), lack of orders
Higgins, Frazier, Lennie, Rayens & Avila	Major Trauma	Acute	bed rest	immobility - 1.5% per day loss of muscle strength, loss of cross sectional size by 2% after 7 days of strict immobility. Morrs 2007, 2011, Winkelman 2009 , risks of immobility out weigh potential benefits. Skeletal muscle can preserve strength despite damage (damaged fibres dont die off and atrophy) - compensation + change in fibre type = preserved bulk and strength	none given		History - periods of immobility prescribed to preserve energy and promote healring in injured individuals.
Kamper, Schultz, Hasen, Andersen, Ekmann, Nygaard, Helland, Wejse, Rahbek, Noerst, Pressel, Nielsen, Finn & Suetta	Acute Medicine	Acute	sarcopenia may aggravate Functional decline and may be a precursor to physical deconditioning	described but unsure of relevance as sarcopenic	none given		lack of staff for mobilisation, lack of time
Koh, Sridaran, & Goh	Orthopedics	Acute	bed rest/ immobility	25% loss of volume in quads and triceps after 60 days bed rest in young women - occurs 3-6x more in older adults. Reduction in older adults gait speed after 10 days bed rest	none given use of falls assesment tool to identify patients at risk of falls due to lower limb weakness	No set criteria - for falls	Nurses don’t routinely engage patients in exercises or mobility despite level of direct interaction with patient Culture of doing things for patients Nurses unfamiliar with documentation Additional workload Fear around falling or exercise with medical conditions Volume of patients Urgent patients heavy workload patients more willing to exercise when motivated by clinicans - but limited time, esp …
Kovar, Carmichael, Jones, & Nichols Robsinson	Elective Surgery	Acute	none given	none given	none given		none given
Small, Tasneem, Bagheri, Chodosh, Adelsheimer, Sutera & Moroz	General Medicine	Acute	prolonged bed rest	none given	none given		Perception patients don’t want to exercise Perception that high intensitiy resistance training is unsafe for older adults or hospitalised patients
Smtih, Sreekanta, Walkeden, Penhale & Hanson	Inpatient Rehabilitation	Rehabiliation/ Post Acute	Prolonged immobility	none given	none given		cost of on going care as a driver to prevent staff fear - falls risk prioritised over activity inflexibilty of healthcare system to implement new practices
Suriyaarachchi, Chu, Bishop, Thew, Matthews, Cowan, Gunawardene & Duque	Virtual Rehabilitation Beds	Rehabiliation/ Post Acute	bed rest Multi factorial eitology	reduced protein synthesis, accelerated loss of muscle mass, strength, power, and Functional capacity	Fulfils AROC impairment code 16.1-16.2 - gneralised deconditioning not attributable to any of the other impairment groups. medical illness or surgery (subgroups)	doesn't actually give me the parameters of the code	No specific rehab protocols exist for HAD
Butler & Welford	Geriatric Medicine	Acute	prolonged bed rest - see 4 barriers	none given	none given		4 barriers 1. Risk aversion 2. unknown level of function 3, widespread "bed is safe" culture 4. lack of equipment
Guilcher, Everall, Cadel, Li, & Kuluski	Acute Medicine Patients, Caregivers, Providers and Decision Makers	Acute	lack of physical, cognitive and social activites high stress hospital - sleep disturbances, poor nutrition, limited mobility, overall uncertainty hospital’s built environment and social capital resources (e.g.,family, roommates, volunteers, staff)	none given	none given - no descriptor of who to approach given		High stress hospitals Literature focus on risk factors, tools, interventions to asses or limit deconditoning 1- level of activity in acute care = boredom, lack of physical activity (lack of staff resource, workload, prioritisation, not seen while waiting for next stage), depression, lack of motivation 2- tensions around patient identity changes and care transitions uncertainty 3- physical and soc…
Laneuville, Rocheleau, Chan Chun, Pelchat & Trudel	Inpatient Rehabilitation	Rehabiliation/ Post Acute	acute hospitalisation	bed rest studies - skeletal muscle dysregulation drive by alterered molecules related to firbosis, inflammation and cell adhesion changes noted in albumin (nutrition), HR (CV), creatinine (renal), hematologic systems (CBC)	Hospitalised for over 3 weeks and needed rehab	inclusion criteria for study	Lack of sensitive biological markers for processes and pathways affected by HAD to categorise its severity and monitor rehabiliation to tailor intervention
Sayer, Whiteaway, Dawson, Simpson & Chu	Geriatric Medicine	Acute	none given	none given	none given		none given
Siebens, Aronow, Edwards, & Ghasemi	Medicine and Surgery	Acute	etiologies unclear - lack of physical activity and exercise in hospital	effect of disuse on muscles - muscle atrophy with loss of myofibrillar protein, motor centres in brain unable to activate motor units, increased fatigue in usable motor units decreased muscle protein synthesis	diagnosis of exclusion - nothing else specific to be followed up by, ambulatory pre adm, LOS 5 days +	no cutoff values,	hospital systems not good at providing physical activity sedentary behaviour of older adult cohort
Hoenig and Rubenstein	Geriatric Medicine	Acute	Manifold - 3 processes, the illness, the treatment effects and the deconditioning effects of IMMOBILISATION	drawn from space flight bed rest analogs of young people predominantly Most affected: CV and MSK - flud balance changes- supine posture = loss of fluid 600cc by day 2, largely from plasma and dec intake, remaining vol goes to upper body. Explains postural hypotension and tachycardia. leads to fear of falling, dec ex tol. Fall in SV and CO on standing after bed rest is 2x as much as baseline. + de…	none given		patients tend to get being unwell, and treatment side effects but deconditioning unanticipated and particularly disabling and disturbing
Creditor	Geriatric Medicine	Acute	Decline cannot be attributed entirely to acute problem - Complications of disease and its management - interaction of hospitalisation and ageing	Loss of VO2 max - reduced periperal use of O2 related to loss of muscle mass and strength and capacity to respond to ex. - muscle strength loss of 5% per day. 10 % per week in young men. - shortening in muscles, and joint structure = loss of ROM - 600 ml loss of fluid -> hypotension and syncope - Resp - increased closing vol = loss of PAo2= confusion in elderly, syncope -Loss of bone mineral from…	none given	8 hazards of hospitalisation	figure 1 - Unable to implement usual strategies to toilet to avoid incontinence (high bed, unfamiliar environment, unclear path to toilet, tethers like IV lines, nasal canual, catheters, use of psychotrophics can cause reduced perception). - Sensory deprivation or overstimulation - 29% of young people in simulated hospital room developed subjective sensory distortions after 2.5hrs - Lack of famil…
Inouye, Wagner, Acampora, Horwitz, Cooney, Hurst & Tinetti	General Medicine	Acute	Treatment side effects Hospitalisation	none given	New decline occuring in hospital in one of 5 BADLS - feeding, bathing, dressing, grooming and toileting. Decline = needing assistance or needing more assistance (mob / transfer exluded due to high level of bed rest orders for population and most likely to need care on d/c)	Criteria is for functional decline	Model of hosptial care - short LOS + high tech contributions to loss of self-care Functional decline likely to be accelerated by adverse factors like treatment side effects, invaqsive proceedures and HAIs
Inouye, Bogardus, Baker, Leo-Summers & Cooney	All	Acute	Frequent use of psychoactive meds, enforced bed rest, indwelling interventions eg catheters/Ivs	none given	none given		2 general models to prevent decline - geriatric consultation services or specialised geriatric units. Both suffer capacity issues, consultation advice may not be carried out due to lack of expertise. Difficult to assess adherance of both. Non adhearnce to program = lack of staff/ volunteers (32%), patient refusal (26%), medical contraindication (22%), patient unavailable. (13%) Staff turn over , …
Brown, Friedkin & Inouye	General Medicine	Acute	low mobility	none given	decline in any non MOBILITY adl (bath, dress, groom, toilet, feed) as rated by nurses	this is the criteria for functional decline	Bedrest ordered in 33% of patients at some point during stay - may be related to use of restraint and immobilising devices not linked to admission cause. Placed on bedrest at admission, and stay there without valid medical reason, Not specified by any clinical staff or correlate with death or treatment
Brown, Rothe, Peel, & Allman	All	Acute	multiple - acute illness and adverse events in hospital Deconditioning associated with bed rest and low mobility= most predictable causes of Functional decline. (5.6 x more likely to Functional ly decline if bed or chair bound regardless of rest of presentation)	none given	recovery ambulation = not confined to bed or chair	Prognostic indicators of resuming mobility time	use of catheters and restraints
Graf	Geriatric Medicine	Acute	Being bedridden in hospital	Creditors cascade to dependency = normal ageing + effects of acute hospital environment. Loss of muscle strength - 5% per day without contraction (repeated cycles of atrophy may cause perm inability to recover) 24-48hrs of bed rest = loss of plasma vol by 7% (500ml), blood shifts to thorax = supression of Antidiuretic hormone -> more water and sodium loss, lower blood vol = false elevation of hae…	Loss of persons independence Assess BADL and IADL, cognition, vision, hearing, social support, psychological well being (purpose is a baseline, determine prognosis, eval treatment, ID services for D/C) do at admission, then daily	no - no cut off values for HAD vs not HAD. Areas of things that should be assessed in a tool depending on setting, purpose etc	Hospital care focus = acute illness and ignoring physical and cognitive function. Lack of finacial resource for staffing, environmental modification Hospital environment designed for caregivers not for patients (high beds, shiny floors, clutter, lack of orientation cues) = fear of falling. Acute illness and uncomfortable environments can worsen depression compounding Functional decline Practice o…
Kortebein, Bopp, Granger & Sullivan	Geriatric Rehabilitation	Rehabiliation/ Post Acute	none given	none given	Functional decline in the absence of newly disabling ortho or neuro diagnosis. Plus Perhaps - acute generalised Functional decline associated with hospitalisation	Debility - ICD 799.3 re iterates lack of set criteria	unclear which location best to rehab patients (most cost effective and appropriate) lack of specific diagnostic criteria for debility, may get coded as generalised weakness, also not part of 75% rule diagnoses expectation bias - harsher admission assessment and more generous at discharge for outcomes
Covinsky, Pierluissi & Johnston	Geriatric Medicine	Acute	rarely explained by single cause - multifactorial see figure Low mobility, malnutrition (NBM orders, poor food), tethers,	none given	"Hospitalization-associated disability manifests as the loss of ability to complete 1 of the basic ADLs needed to live independently without assistance: bathing, dressing, rising from bed or a chair, using the toilet, eating, or walking across a room." studies examining risk factors outcome points -> loss of independence in ADLs (time frame, 2 weeks pre adm to d/c, at d/c, during hospital stay ne…	Assessment areas - no set criteria for diagnosis of HAD. Covers features of those most likely to go on to develop HAD. Prognostic not diagnostic	Hospital care - iatrogenic risks, lack of adaptations, environment, mob restriction, enforced dependence, little encouragement of independence Silo'd health care - PT/occupational therapists,/ geri's rather than MDT approach little research into who with HAD will benefit most from rehab - given age bracket it may be irreversible and disease related decline, therefore approach dual with palliative…
Haley, Sullivan, Granger, & Kortebein	Geriatric Rehabilitation	Rehabiliation/ Post Acute	none given	none given	subjective clinical diagnosis. Suggests Raj et al used as a starting point for criteria (=p 135 of raj article	No set criteria ICD-9 codes Debility = 799.3 Generalised weakness = 780.79, 728.2, and 728.87	Debility not an accepted diagnosis under 60% (prev 75%) rule which allows providers to state they do inpatient rehab. (% of patients must have 1 of 13 diagnoses)
Krumholz	All	Acute	hospitalisation, physiological impairment, lack of reserve Sleep deprivation poor nurtition disrupted daily rhythms pain mentally challenging situations drug side effects - esp cog deconditioned by bed rest and inactivity	Sleep - reduced REM and N3 (slow wave), increased stage 1 (NREM). - effects on metabolsm, cogntiion, physical function, coordination, immunity, coagulation and cardiac risk. Malnutrition - poor healing, increased infection risk, decreased resp and CV function, poorer physical function, worse outcomes in COPD, CV and GI disorders	impaired stamina, coordination and strength for deconditioning readmission within 30 days for PHS	Criteria for PHS , no cut off values	staff not introducing selves and roles, confusing orders and schedules bed pressure to reduce LOS - less time to get it right
Sanchez-Rodriguez, Marco, Miralles, Fayos, Mojal, Alvardo, Vazquez-Ibar, Escalada & Muniesa	Subacute Geriatric Rehabilitation	Rehabiliation/ Post Acute	sarcopenia a precipitating/ exagerating factor in HA ?Functional decline	none given	Functional loss 2nd to a none disabling medical disease (eg no fractures, nuero or amputations)	Study inclusion criteria. criteria given for dx sarcopenia	none given
Chastin, Harvey, Dall, McInally, Mavroeidi & Skelton	All	Acute	sedentary behaviour - sitting, reclining or lying without much energy expenditure <1.5MET. Pts do 12hrs a day too much sed likely contributes to PHS	none given	PHS - readmission within 30 days	criteria is for post hospital syndrome	immobilisation not used a theraputic tool but is still widespread in healthcare - most patients in hospital still sedentary. Traditional care limits movement - concerns of falls, -> impact on behaviour and after d/c Lack of staff, lack of time, organisational risk aversion> function focussed rehab and activity Putting empahsis on individual (BioMed model) lets systems off the hook. Sed behav is a…
Hartley, Keating, Jeffs, Raymond & Smith	General Medicine	Acute	Hospital care, loss of muscle strength (acute sarcopenia) due to bed rest and inactivity	none given	study inclusion/ exlusion critiria referenced	No cut off values available for SPPB,
Swinnerton & Price	Geriatric Medicine	Acute	Prolonged immobility, pain, fatigue, sleep disturbances, on going health issues	External stressors which negatively affect internal homeostatic mechanisms. Links between non ambulatory status, saropenia and dysphagia and sarcopenia and deconditioning	Decrease in muscle mass and over all function. Pressure ulcers, malnutriton and falls screening tools e.g Waterlow, MUST and Falls risk assessment tool Nursing assessment (clinical) of baseline mobility and function, repeat after few days stay to determine if experiencing deconditioning Medical, mobilty, Functional , cognitive and psychological assessments for those at AF9, CAM for delerium,	clinical assessment based on decline from baseline ability.	Lack of opportunity to mobilise due to insuffient hospital resources, nursing time constraints, safety concerns, patient non adherance
Beam, Gorman, Kist, Giles, Kiser & Dumire	Medical and Surgical	Acute	immobility, elderly patients walking or standing for 66-117 minutes per 24 hour period	Patients, age 65 and older, spend most of their hospital stay in bed instead of walking or being out of bed (OOB) [2]. As a result, muscle loss, venous thromboembolism, pressure injuries, orthostatic hypotension, loss of concentration and motivation, depression, and delirium occur because of immobility	MOVE Grading	Evaluative rather than diagnostic.	Reliance on standard practice that nurses will mobilise all patients - unable to due to rising patient acuity, resource shortages and covid 19 pandemic (limitations in PPE + trying to reduce infection = clustered care practices, reduction in F2F time, more external and travel nurses on staff, impact of negative PCR testing for discharge - 10 day isolation if positive)
Beisheim-Ryan, Butera, Hinrichs, Derlein, Malong, Holtrop, Forster, Diedrich, Gustavson, & Stevens-Lapsley	Skilled nursing facilities	Rehabiliation/ Post Acute	none given	none given	none given		Contextual factors which create barriers to intervention effectiveness = organisational and team dynamics, perception of intervention effectiveness, risk-averse culture)
Sourdet, Lafont, Rolland, Nourhashemi, Andrieu & Vellas	Geriatric Medicine	Acute	May be due to illness that led to hospitalisation, stress of hospitalisation, prolonged bed rest, sensory isolation, social isolation, excessive noise, healthcare management issues	none given	Hospitalization-associated disability was defined as a loss of 0.5 points or more on the total Katz ADL score between admission and discharge.	Hospitalization-associated disability was defined as a loss of 0.5 points or more on the total Katz ADL score between admission and discharge.	Health service poorly adapted to aging and frail populaion, elderly patients don't systematically get appropriate care during hospitalisation
Wai, Lu, Gill, Henderson and Auais	General Medicine	Acute	Immobility during hospitalisation	loss of muscle mass and strength, diminished aerobic capacity	New or additional disability in ADL that develops during admission	New or additional disability in ADL that develops during admission	none given
Urquiza, Fernandex, Arrinda, Espin, Garcia-Garcia, Rodriguez-Larrad and Irazusta	Orthogeriatric Rehabilitation	Rehabiliation/ Post Acute		none given	Clinical assessment	Patients who experienced a functional decline in the absence of newly disabling orthopedic or neurologic diagnoses were classified as patients with HAD.
Pavon, Sloane, Pieper, Colon-Emeric, Cohen, Gallagher, Hall, Morey, McCarty and Hastings	General Medicine	Acute	Immobility during hospitalisation, taking less than 900 steps per day	none given	The primary outcome was HAD, defined as having one or more of the following: (1) a new activity of daily living (ADL) deficit from the Katz Activities of Daily Living scale,17 (2) a decline of 4 or more points from baseline to discharge in the functional component of the abbreviated Late-Life Function and Disability Instrument (LL-FDI),18,19 or (3) discharge to a skilled nursing facility (SNF) de…	Late-Life Function and Disability Instrument, Katz ADL	lack of a reliable and clinically meaningful way to measure mobility in the inpatient setting.
Ortiz-Alonso, Bustamante-Ara, Valenzuela, Vidan-Astiz, Rodriguez-Romo, Mayordomo-Cava, Javier-Gonzalez, Hidalgo-Gamarra, Lopez-Tatis, Valades-Malagon, Santos-Lozano, Lucia, and Serra-Rexach	Geriatric Medicine	Acute	immobility	none given	Hospitalization-associated disability [HAD, ie, loss of the ability to perform one or more basic activities of daily living (ADLs) independently at discharge]	Katz ADL 6 (eating, transferring from bed to chair, walking, using the toilet, bathing, and dressing), each of which is scored with 0 or 1 depending on whether the participant is able to perform the activity with or without help, respectively	lack of space, purchase and storage of weight training equipment

## Sheet: Sequelae
Authors	Population	Care Focus	clinical course incl presenting feature, trajectory, complications
Siegler, E. L., Stineman, M. G. & Maislin, G.	Inpatient Rehabilitation	Rehabiliation/ Post Acute	more likely to have complications that interupt rehab those with lower bartel scores, more comorbidities more likely to develop complications
Hoenig, H	Geriatric Rehabilitation	Rehabiliation/ Post Acute	consequences: osteoporosis, loss of muscle strength (esp lower limbs) and flexibility The most deconditioned demonstrate the largest percentage improvement from even a modest degree of fitness training. (moved to clinical course 18/10/22)
Conlin Shaw, M	All	Acute	Rapid deconditioning can lead to a loss of ability to walk and transfer. Deconditioning can place many elderly persons at high risk for the development of pressure ulcers consequences of bed rest: sensory deprivation, mental lethargy, balance problems, dec CO, increased risk of resp problems, loss of muscle mass and strength, bone loss, DVT, PE, constipation, renal stones and PU. Elderly specific…
Rader, M & Vaughen, J.	Orthopedics	Acute	Clinically in an elderly individual – becomes dull and demonstrates diminished intellectual capabilities. The deconditioned patient may be depressed, anxious, lethargic, dependent, and withdrawn from family and others. Prone to staggering and falls 2nd to muscular weakness and decreased coordination. Diminished appetite, often selectively for protein rich foods is common. Double incontinence are …
Timmer, Unsworth & Browne	Geriatric Rehabilitation	Rehabiliation/ Post Acute	none given
Spencer, J., Hersch, G., Eschenfelder, V., Fournet, J. & Murray-Gerzik, M.	Transitional Unit	Rehabiliation/ Post Acute	presenting feature not defined ("health crisis" p165). Of the 8, 4 returned home, 4 moved to new settings (2 NH), 3 needed more support on D/C CCE + CAPA conversations
Deshpande, MacNeill, Lichtenberg, Pithadia & Velez	Geriatric Rehabilitation	Rehabiliation/ Post Acute	none given (Changed to clinical course from prevention 17/10/22) Predictors of doing well: Higher admission FIM- lower likely to go to NH (both) Acute only- younger and white more likely to D/C to community (Moved to CC 18/10/22 from I&E) Acute sample had shorter LOS, fewer Dx, high FIM at admission and D/C and more likely to D/C to community therefore less sick, high function, and able to benefi…
Unsworth & Eyres	Surgery	Acute	deconditioning may last beyond acute hospitalisation and may not be readily reversed.
Killewich, L	Geriatric Surgery	Acute	Downward spiral, deconditioning is the result of inactivity but itself produces more inactivity, producing more deconditioning, inactivity and ultimately bed-ridden or wheelchair bound status and possible NH placement or even death. Reduced cognitive function, QoL, and independence 6 months of rehab failed to normalise changes in LL from bed rest
Lim, Doshi, Castasus, Lim & Mamun	Geriatric Medicine	Acute	none given
Aizen, Shugaev & Lenger	Geriatric Rehabilitation	Rehabiliation/ Post Acute	associated with falls from sitting or lying down, second week of rehab, weakly associated with antidepressent use Orthostatic intolerance
De Morton, Keating & Jeffs	General Medicine	Acute	none given
Raj, Munir, Ball, & Carr	General Medicine	Rehabiliation/ Post Acute	Increased LOS, higher hospital costs, increased risk of institutional d/c, readmission (21%). Most predictive factor for D/C home was baseline FIM. Ave hospital stay was 9 days.
Silver & Siebens	Surgery	Acute	Difficult or impossible to reverse - can lead to permaenent insitutionalisation following a downward spiral, onset after a few days
Ng, Jung, Tay, Bok, Chiong & Lim	Inpatient Rehabilitation	Rehabiliation/ Post Acute	associated with a reduced FIM score on D/C and less gain over all
Bailey, Miller, Russell & Clemmer.	ICU	ICU	none given - usually not considered in ITU
Baztan, Galvez, Cesar, & Socorro	Geriatric Medicine	Rehabiliation/ Post Acute	Worse Functional status associated with higher short and long term mortality. Adjusted HR = 1.79 (CI 1.08-2.98). 1 year mortality = 31.6%
Belavy, Miokovic, Armbrecht, Richardson, Rittweger & Felsenberg	Research	Other	some atrophy due to effects of injury itself, little info available on pattern of atrophy onset
Kortebein	All	Acute	Older patients it is associated with higher rates of institutionalisation Younger patients with prolonged stays in critical care which can have a prolonged delterious effect on funtional abilities. Lower extremities most affected Functional impairment depends on severity - limited ambulation endurance, difficulty with stairs Deficits in bed mobility, transfers, basic ADLs falls - orthostatic hypo…
Manning, Keller & Frank	General Medicine Registered Nurses	Acute	Functional decline appears in a heirachical pattern
Venturelli, Crisafulli, Antoni, Trianni & Clini	ICU	ICU	none given
Schweickert & Kress	ICU	ICU	at 1 year post ARDS - loww of muscle bulk, proximal muscle weakness, fatigue, 50% unemployment in young adults, persisted at 5 years
Dennis, Johnson, Roberson, Heif, Bopp, Garner, Padala, Padala, Dubbert & Sullivan	Recuperation and Recovery Ward	Rehabiliation/ Post Acute	compromised walking score - 56% walked <15m with assistance or aid, 41% eating less than 50% of rec protein, 81.8% had albumin below normal range, 70.2% had CRP above the reference range. On D/C - 42% improved Katz adl, 58% improved walking, 25% had worse nutrition and albumin. Improvement in function correlated (+2 points) with albumin, prealbumin and protein intake, also reduced CRP and proinfl…
Goodman, Bonner, Wright, Hugill, Howard, Danjoux, Batterham & Howell	ICU	ICU	survival of ICU leads to imparied physical reserve, and a reduced QoL. Cardio respiratory deconditioning, anxiety and depression and PTSD all contribute
Gosselink, Neddham, & Hermans	ICU	ICU	none given
Guy, Lerman & Justo	Geriatric Rehabilitation	Rehabiliation/ Post Acute	not really discussed
Mendez-Tellez, Pedro, Nusr, Feldman & Needham	Neurology ICU	ICU	Rapid and severe - onset within days of hospitalisation, may last years Disuse atrophy - muscle wasting with flacid features, normal or reduced strength with significant loss of endurance, no sensory deficits, preserved reflexes, normal nerve studies, abnormal/absence of spontaneous activity
Soares, Nucci & Silva	Surgery	Acute	Following abdo surgery patients have lowered mobility and limited symptoms to perform ADLs due to pain and deconditioning muscle.
Vargo, Wilson, Fuentes & Eliam	Inpatient Rehabilitation	Rehabiliation/ Post Acute	none given
Cabilan, Hines & Munday	Surgical Prehabilitation	Other	none given
Doherty-King & Bowers	Medicine and Surgery Registered Nurses	Acute	associated with falls during and post D/C, NH admission, increased LOS, increased mortality. 30% don't get better after d/c
Drolet, Dejuilio, Harkless, Henricks, Kamin, Leddy, Lloyd, Waters & Williams	ICU and Intermediate Care	ICU	deconditioning leads to impaired mobility, potential for longer hospital stays, persistant physical and neuropsychiatric disabilities (in ICU), deconditioning led to cancellation of discharges, or needing transfer to rehab
Engel, Tatebe, Alonzo, Mustille & Rivera	Medical and Surgical ICU	ICU	none given
Friedman, Mayer, Hoyer & Atanelov	General Medicine	Acute	none given
Silveira, Pez, Nogueira, Furlan & Colombo	ICU	ICU	none given
Timmer, Unsworth & Taylor	Geriatric Rehabilitation	Rehabiliation/ Post Acute	Onset within 2-3 days of hospitalisation, cumulative and multifactorial nature. Improvements can happen from discharge up to one year post
Sottile, Quan, McNulty, Gray, Higgins & Moss	ICU	ICU	none given
Wakabayashi & Sakuma	Geriatric Rehabilitation	Rehabiliation/ Post Acute	May be triggered independent of successful treatment of admission cause. Malnutrition and sarcopenia complicate clinical course
Wakabayashi & Sashika	Geriatric Rehabilitation	Rehabiliation/ Post Acute	Disuse syndrome - step wise or gradual decline in fucntioning, can be triggered even when recovered from admission cause
Falvey, Mangione & Stevens-Lapsley	Geriatric Medicine	Acute	Primary dx of deconditioning have poorer rehab outcomes, higher readmission, lower rates of d/c to community, higher mortality rate. General loss of physical reserve+ Functional reserve - unable to handle additional stressors without loss of independence Slow gait speed, muscular weakness, decreased stamina, diminished appetite, fatigue and decreased ability to carry out ADLs (common cluster of s…
Latronico	ICU	ICU	presents with symetric, generalised weakness, acute onset, unrelated to critical illness, affects limbs and NM respiratory, facial muscles spared, decreased muscle tone, inconsistent deep tendon reflex loss, severe cases = flaccid paresis/plegia, may also present with altered sensation, ataxia and pain at long term follow up
Timmer, Unsworth & Taylor	Geriatric Rehabilitation Occupational Therapists	Rehabiliation/ Post Acute	Functional decline occurs within 2-3 days
Artaza, Valera, San Juan, Urien, Fernandez & Malafarina	Functional Recovery Unit	Rehabiliation/ Post Acute	low vit D associated with worse Functional recovery, lower admission bartel and longer LOS in rehab
Booth, Rivet, Flici, Harvey, Hamill, Hundley, Holland, Hubbard, Trivedi & Collier	Neurotrauma ICU	ICU	Airway, pulmonary and vascular complications
Fisher, Graham, Krishnana & Ottenbacher	Geriatric Rehabilitation	Rehabiliation/ Post Acute	deconditioned and medically complex older adults have highest 30 day readmission rate in the 6 largest rehabilitation impairment categories. Admitting diagnosis of debility - 77.1% readmission rate, Functional gain is the strongest predictor (less than 12.5 = more likely readmisson), followed by a short LOS (9.5 days), and then discharge FIM
Galloway, Karmarkar, Graham, Tan, Raji, Granger & Ottenbacher	Inpatient Rehabilitation	Rehabiliation/ Post Acute	11-14% discharge back to acute hospital. Ave of 11.9 days in rehab. Protective motor items against re/ad on FIM- locomotion, stairs (60), lower body dressing (remained protective), eating (30), bowel (30) and bladder control (60). Lower motor score, multi morbidity and being un married most indicitive of readmission.
Pack, Miwa, Engleman, Lagu, Visintainer, Lindenauer & Woodbury	Cardiac Surgery	Acute	none given
Corcoran, Gavaghan, Lyons & Moloney	Geriatric Medicine	Acute	none given
Norheim, Bautmans & Kjaer	Geriatric Medicine	Acute	none given
Ritchie, Wood, Martin & Jones	Geriatric Medicine Nursing Assistants	Acute and Post Acute	none given
Burkhardt & Parigger	Geriatric Early Rehabilitation	Rehabiliation/ Post Acute	none given
Churilov, Churilov, Maclsaac & Ekinci	Inpatient Rehabilitation	Rehabiliation/ Post Acute	none given - sarcopenia associated with falls, disability and osteoporosis, may be increased by periods of hospital immobility and fasting
Donnelly, Jevons and Wentworth	Geriatric Rehabilitation	Rehabiliation/ Post Acute	none given - often refused on basis of cognitive frailty or poor motivation
McInerney, McCarthy, McCullagh, Fox & Timmons	Geriatric Medicine	Acute	none given
O'Sullivan & Cleffken	ICU	ICU	none given
Petrucci, Ricotti, Monteleone, Ferriero, Giromini, Guillace, Ambrosini, & Dalla Toffola	Geriatric Surgery	Acute	recovery of walking ability not influenced by pre op function in this model - only PPDS and VAS at last rehab session predict of regaining walking. Hence - possible to predict walking recovery and d/c dest after a few days Functional deteroration starts in the first 48hrs after surgery (15- this is Kwon 2012) - at odds with Kwon et al -
Stapley, Colley & Richards	Geriatric Medicine	Acute	none given
Yoshimura, Wakabayashi, Bise & Tanoue,	Convalescent Rehabilitation	Rehabiliation/ Post Acute	in HAD sarcopenia appears to be a majorly linked to dysphagia and ADL limitations but the causal relationship is unclear
Churilov, Churilov, Brock, Murphy, Macisaac, & Ekinci	Inpatient Rehabilitation	Rehabiliation/ Post Acute	none given
Dirkes & Kozlowski	ICU	ICU	NM abnomalities found in as little as 10 days in ITU patients. Weakness and physical disability can persist for years on d/c in ITU pop (context dependent) MV over 21 days = prolonged Functional limitation, improved lung vol at 6 months but only 38% returned to work and 32% in full capacity
Gordon, Grimmer & Barras	Geriatric Medicine	Acute	Noted at DC when it stops successful DC. Older people can have irreversable loss of function, and development of frailty, decreased life expectancy and QoL. Occurs within days. Insideous onset, can cause discharge delays.
Horgan, Carr & Murphy	General Medicine	Acute	none given
Husain-Qureshi & Kirkwood	ICU	ICU	none given
Johnson, Swiatek, Wang, Liu, Chung, & Chung	Surgery	Acute	Global period of fundtional decline, correlated with poor medical outcomes (20-22) (Krumholz, Kortebein, Brownlee) Brownlee - PHS at time of elective hernia repair = independent risk factor for post op complications
Parksinon	Orthopedics	Acute	none given
Rogerson & Kendall	Geriatric Medicine	Acute	none given
Timmer, Unsworth, & Browne	Geriatric Rehabilitation	Rehabiliation/ Post Acute	anectodally change noticable after 10 days rehabiliation
Asif, Taube, Sivarajah, Tsironis & Koizia	Surgery	Acute	none given
Bono & Reyes	Medicine and Surgery Registered Nurses, Patient Care Associates and Residents	Acute	HAD leads to decreased mob and participation in community years after hospital. Assocaited with increased LOS
Higgins, Frazier, Lennie, Rayens & Avila	Major Trauma	Acute	long term Functional limitations may persist over 12 months post discharge (44%)
Kamper, Schultz, Hasen, Andersen, Ekmann, Nygaard, Helland, Wejse, Rahbek, Noerst, Pressel, Nielsen, Finn & Suetta	Acute Medicine	Acute	none given
Koh, Sridaran, & Goh	Orthopedics	Acute	prolonged bed rest -> muscle mass loss and weakness associated with loss of gait speed -> falls
Kovar, Carmichael, Jones, & Nichols Robsinson	Elective Surgery	Acute	none given Short op (<180 mins), recovers quickest, followed by long op, delerium = longest recovery trajectory
Small, Tasneem, Bagheri, Chodosh, Adelsheimer, Sutera & Moroz	General Medicine	Acute	prolonged bed rest -> deconditioning -> need for rehab services post discharge
Smtih, Sreekanta, Walkeden, Penhale & Hanson	Inpatient Rehabilitation	Rehabiliation/ Post Acute	May result in delayed discharge, increased readmission (3x risk in 30 days compared to medically complex older adults with higher physical function), admission to community beds physiological stress post discharge due to reduction in function -> increased risk of complications not directly related to adm during recovery from acute illness Negative impact on well-being and QoL Enhanced care recipi…
Suriyaarachchi, Chu, Bishop, Thew, Matthews, Cowan, Gunawardene & Duque	Virtual Rehabilitation Beds	Rehabiliation/ Post Acute	bed rest changes - reduced muscle strength, esp LL. CV -> loss of reflexes -> orthostatic hypotension -> syncope and falls. NM - joint stiffness, impaired balance, coordination -> falls and fractures Arthritis pts showed best improvement, delerium showed worst
Butler & Welford	Geriatric Medicine	Acute	increased LOS, extra social costs, decreased QoL
Guilcher, Everall, Cadel, Li, & Kuluski	Acute Medicine Patients, Caregivers, Providers and Decision Makers	Acute	Boredom and depression patient identity- things different due to deconditioning sense of being pushed out before ready fearful of developing Functional decline but fearful of doing somehting about it
Laneuville, Rocheleau, Chan Chun, Pelchat & Trudel	Inpatient Rehabilitation	Rehabiliation/ Post Acute	Occur within a few days, delay discharge, increase risk of readmission, and mortality +inc health car costs Routine care - 1-2hrs PT over 2 sessions daily (strength, endurance, mobility, ambulation) 1-2 hrs occupational therapists, - transfers, ind ADLs Psychology Rehab nursing - 3hrs per day usual LOS - 4+ weeks, some (3 patients) over 6 weeks (moved to CC from I&E 19/10/22)
Sayer, Whiteaway, Dawson, Simpson & Chu	Geriatric Medicine	Acute	longer LOS, premature care home, loss of function in hospital
Siebens, Aronow, Edwards, & Ghasemi	Medicine and Surgery	Acute	acute = changes ocurring days to weeks , occuring from bed rest. Changes seen in mood, coordination , muscle strength, work tolerance and balance mob loss restored within 1 week post d/c in 66% of cases loss of adl - 40% remained dependent in 1+ at 3 months post d/c chronic = months to years
Hoenig and Rubenstein	Geriatric Medicine	Acute	recovery of CV changes may take several weeks in healthy young men after prolonged bed rest HR changes and VO2 peak - one month - MSK changes - 5+ weeks post cast removal Deconditioning/ loss of ex tol assessed in hallway before d/c / if problems are apparent during hospital course
Creditor	Geriatric Medicine	Acute	Functional decline starts from day 2 compared to baseline. Reconditioning takes longer than deconditioning time period falls due to loss of strength - esp if climbing over rails on high hospital bed - loss of vertebral bone mass after 10 days BR took 4 months to restore Figure 1 - if it all goes to pot/cascaode to dependency = d/c to NH
Inouye, Wagner, Acampora, Horwitz, Cooney, Hurst & Tinetti	General Medicine	Acute	associated with higher mortality, rates of institutionalisation, greater health expenditure Median onset - day 3, most commonly lost 1 ADL (53%), most often toileting (23/188) followed by dressing and grooming (21/188)
Inouye, Bogardus, Baker, Leo-Summers & Cooney	All	Acute	Higher rates of institutionalisation, rehab needs, home care, greater health expenditure
Brown, Friedkin & Inouye	General Medicine	Acute	Onset day 3 and beyond
Brown, Rothe, Peel, & Allman	All	Acute	Occurs within days of admission, few recover ability by discharge, loss of ambulation is significantly associated with decline in other ADLs Functional decline strong predictor of LOS, NH placement and death
Graf	Geriatric Medicine	Acute	Can occur as early as day 2. Functional decline leads to increased risk of illness and death, less autonomy, greater dependence, reduced QoL, occasional institutionalisation, increased LOS and readmission rates.
Kortebein, Bopp, Granger & Sullivan	Geriatric Rehabilitation	Rehabiliation/ Post Acute	many unable to return home - need rehab Ave time to dx = 15.3 days to note primary dx of debility
Covinsky, Pierluissi & Johnston	Geriatric Medicine	Acute	Insideous onset - gradually adding issues till unable to do ADL. Picked up at discharge when noted patients cant care for themselves 1 year after d/c fewer than 50% of older adults have returned to their pre morbid baseline. 41% died at 12 months, 29% disabled at 12 months, 30% return to pre morbid baseline prognosis - table 2.
Haley, Sullivan, Granger, & Kortebein	Geriatric Rehabilitation	Rehabiliation/ Post Acute	Could use rehab effiency below 1.5 to trigger assessment of barriers to rehab mortality low but transfer back to acute care is high. Who benefits most from intense rehab vs post acute care?
Krumholz	All	Acute	jet lag type disability, weight loss, delerium and cognitive overload, impact on ability to comply with post hospital self management and follow up appointments
Sanchez-Rodriguez, Marco, Miralles, Fayos, Mojal, Alvardo, Vazquez-Ibar, Escalada & Muniesa	Subacute Geriatric Rehabilitation	Rehabiliation/ Post Acute	over 8 years - sarcopenia = 27% more risk for disability, 80% for severe sarcopenia Longer LOS, higher rate of readmission and mortality PwSarcopenia - worse on adm, recover similar but don’t continue to recover after d/c
Chastin, Harvey, Dall, McInally, Mavroeidi & Skelton	All	Acute	people with MSK or other acute or chronic illness in hosp tend to be more sedentary and this stays after d/c Even if full recovered and medically stable. Immobility = potential chest infections, msucle degeneration, blood clots
Hartley, Keating, Jeffs, Raymond & Smith	General Medicine	Acute	hospital-associated Functional decline defined as an increased dependence in activities of daily living (ADL). However, many also experience a reduction in Functional mobility , cognition , and quality of life. Furthermore, hospital-associated Functional decline is associated with length of hospital stay, new-institutionalisation , readmission , progressive disability and mortality.
Swinnerton & Price	Geriatric Medicine	Acute	Deconditioning is associated with further immobility, reduced ability to walk, falls, confusion, swallowing difficulties, pressure ulcers, constipation, lack of appetite and venous thromboembolism (BGS 2020).
Beam, Gorman, Kist, Giles, Kiser & Dumire	Medical and Surgical	Acute	Due to being in bed for most of hospital stay elderly develop muscle loss, VTE, PU, orthostatic hypotension, loss of concentration, motivation, and development of depression and delerium. Extended bed rest = prolonged LOS, HAP, PU, Falls
Beisheim-Ryan, Butera, Hinrichs, Derlein, Malong, Holtrop, Forster, Diedrich, Gustavson, & Stevens-Lapsley	Skilled nursing facilities	Rehabiliation/ Post Acute	Skilled nursing facility rehabilitation is commonly required to address hospital associated deconditioning among older adults with medical complexity.
Sourdet, Lafont, Rolland, Nourhashemi, Andrieu & Vellas	Geriatric Medicine	Acute	Loss of independence in ADL regardless of need for pre-admission assistance, increased risk of mortality, re-hospitalisation, need for formal and informal home services, institutionalisation
Wai, Lu, Gill, Henderson and Auais	General Medicine	Acute	Health scholars have established that a chain of events, including immobility during hospitalization, induces physiological deconditioning that leads to functional decline and, subsequently, hospital-acquired disability (HAD) [3–5]. HAD is defined as a new or additional disability in activities of daily living (ADL) that develops during admission [6–8].
Urquiza, Fernandex, Arrinda, Espin, Garcia-Garcia, Rodriguez-Larrad and Irazusta	Orthogeriatric Rehabilitation	Rehabiliation/ Post Acute	The functional recovery of patients with HAD is often influenced by reduced physiologic reserve,5 whereas in those patients with OG conditions, it is related to the orthopaedic injury or prosthetic surgery. To our knowledge, there is a lack of information about the predictive factors of hospital readmission and institutionalisation in patients attending GR with OG or HAD conditions, which are ver…
Pavon, Sloane, Pieper, Colon-Emeric, Cohen, Gallagher, Hall, Morey, McCarty and Hastings	General Medicine	Acute	presents as change to ADL independence, caused by immobility in principle
Ortiz-Alonso, Bustamante-Ara, Valenzuela, Vidan-Astiz, Rodriguez-Romo, Mayordomo-Cava, Javier-Gonzalez, Hidalgo-Gamarra, Lopez-Tatis, Valades-Malagon, Santos-Lozano, Lucia, and Serra-Rexach	Geriatric Medicine	Acute	presents as change to ADL independence at discharge, associated with long term disability, institutionalisation and death

## Sheet: Risk Factors
Authors	Population	Care Focus	risk factors (individual)	associated co-morbidities or conditions	compared syndromes
Siegler, E. L., Stineman, M. G. & Maislin, G.	Inpatient Rehabilitation	Rehabiliation/ Post Acute	long and difficult acute hospitalisations preceding transfer to rehab p2189	none given	none given
Hoenig, H	Geriatric Rehabilitation	Rehabiliation/ Post Acute	none given	none given	none given
Conlin Shaw, M	All	Acute	Being elderly, marginally active, acute illness, bed rest	none given	bed rest, pressure ulcers Deconditioning is a contributory factor to the development of pressure ulcers
Rader, M & Vaughen, J.	Orthopedics	Acute	Increasing age - although not predictive in itself, severe degenerative or debilitating conditions (aids, cancer, cardiopulmonary disease) Individual most at risk = those with stroke due to clinical manifestations of stroke compounded by disuse atrophy, cardioresp deconditioning, cerebral and coronary arteriosclerosis which may limit the rate and degree of recovery. On top of concurrent PVD, kidn…	none given	Elderly individuals admitted under diagnosis of "failure to thrive"
Timmer, Unsworth & Browne	Geriatric Rehabilitation	Rehabiliation/ Post Acute	none given	Frailty	Mentions patients often frail but doesn’t delineate further
Spencer, J., Hersch, G., Eschenfelder, V., Fournet, J. & Murray-Gerzik, M.	Transitional Unit	Rehabiliation/ Post Acute	none given	Hip fracture, falls, exacerbation of chronic disease (cardiac, diabetes, pulmonary, CVA), hypothyroidism, malnutrition, amputation, degenerative joint disease, ataxia, PVD, bipolar disorder, personality disorder, depression, adjustment disorder	none given
Deshpande, MacNeill, Lichtenberg, Pithadia & Velez	Geriatric Rehabilitation	Rehabiliation/ Post Acute	none given	none given
Unsworth & Eyres	Surgery	Acute	Older age - comparatively more sedentary in hosptial, more susceptible to clinical effects of inactivity during illness Patient attitudes - perception of being in hosptial "to rest"	none given	none given
Killewich, L	Geriatric Surgery	Acute	Ageing - perfomance starts to drop after 35 years of age until 60 where it really drops off. Muscle loss = declines of 15% per decade in 60/70s and 30% per decade 80s on. Pain, depression and fatigue can explain 14.3% of the variation in Functional status, up to 30% at 30 days, stable at 90 days	Hip fracture, PVD-> limb threatening ischemia Frailty Unsteadiness and risk of ralls	none given
Lim, Doshi, Castasus, Lim & Mamun	Geriatric Medicine	Acute	Age - elderly	none given	none given
Aizen, Shugaev & Lenger	Geriatric Rehabilitation	Rehabiliation/ Post Acute	presence of depression - impaired motor coordination and longer response time. Antihypertensive use	none given	none given
De Morton, Keating & Jeffs	General Medicine	Acute	Age < 85 Functional impairment pre hospital Caucasian Use of walker or wheelchair pre admission More than 4 comorbidities Dx of cancer (Mahoney et al 1998)	cancer	none given
Raj, Munir, Ball, & Carr	General Medicine	Rehabiliation/ Post Acute	History of CVA	Osteoporosis Polypharmacy - 9+ meds Delerium Depression (geriatric depression screen) Pressure sores (Braden scale) Unitentional weightloss Vit D deficiency Pain (VAS) Frailty CV risk factors Lots	none given
Silver & Siebens	Surgery	Acute	Ageing - breathing capacity, nerve conduction velocity, basal metabolic rate and marathon record rate drop from 30s onwards, reduced motivation or ability to participate in formal exercise programs, lack of exercise tolerance	surgery	none given
Ng, Jung, Tay, Bok, Chiong & Lim	Inpatient Rehabilitation	Rehabiliation/ Post Acute	none given	Long term IV anti biotic use due to chronic infections, dialysis for end stage renal failure	none given
Bailey, Miller, Russell & Clemmer.	ICU	ICU	Pain, sleep deprivation, fear, anxiety, lack of control, nightmares, delerium,	PTSD from oversedation	none given
Baztan, Galvez, Cesar, & Socorro	Geriatric Medicine	Rehabiliation/ Post Acute	none given	Hip fracture Stroke Intracranial injury Hip and pelvis injury Rhabdomylsis Congestive heart failure PVD Venous and pulmonary embolism Pneumonia Acute respiratory infections COPD UTI Surgical interventions Endocrine and metabolic diseases MSK diseases Neurology disorders Digestive disorders	decreased Functional reserve = frailty, potentially reversible and recovery can influence a reduction of long term mortality Stroke mortality -17%, Ortho mortality - 14.1%
Belavy, Miokovic, Armbrecht, Richardson, Rittweger & Felsenberg	Research	Other	none given	none given	none given
Kortebein	All	Acute	ageing Pre hospital functioning - aids, IADL,/BADL, cognition	Sarcopenia (age related) Cancer severe heart failure cardiac transplant chronic renal insufficency severe COPD survived critical illness (CIM/CIP associated with systemic corticosteroids, dx with EMG) Anemia pain sleep deprivation fatigue depression	CIP/CIM - assocaited with ITU and systemic corticosteroids which increase catabolism, dx with EMG/ nerve conduction
Manning, Keller & Frank	General Medicine Registered Nurses	Acute	none given	none given	none given
Venturelli, Crisafulli, Antoni, Trianni & Clini	ICU	ICU	none given	pneumonia	none given
Schweickert & Kress	ICU	ICU		ARDS Sepsis Septic shock multisystem organ failure	ICU -AW (common complication of critical illness)- associated with systemic conditions eg sepsis. causes severe Functional impairment, profound NM weakness
Dennis, Johnson, Roberson, Heif, Bopp, Garner, Padala, Padala, Dubbert & Sullivan	Recuperation and Recovery Ward	Rehabiliation/ Post Acute	none given	none given	cachexia - end stage organ disease - bed rest, raised inflammatory markers and anorexia,muscles atrophy regardless of nutrition?
Goodman, Bonner, Wright, Hugill, Howard, Danjoux, Batterham & Howell	ICU	ICU	none given	none given	none given
Gosselink, Neddham, & Hermans	ICU	ICU	none given	none given	ICU AW - deconditioning + weaning failure?
Guy, Lerman & Justo	Geriatric Rehabilitation	Rehabiliation/ Post Acute	Low body mass (associated with poor outcome)	hypertension Ischemic heart disease Diabetes t 2 Depression, demntia, PAF/CAF, CHF, cancer, CVD, hypothyroidism, PD, COPD	pressure ulcers - increased risk of mortality and morbidity
Mendez-Tellez, Pedro, Nusr, Feldman & Needham	Neurology ICU	ICU		SIRS, sepsis, multiorgan dysfunction	for ICU AW - EMG, nerve conduction studies - sensorimotor axonopathy with reduced compound muscle action potentials and sensory nerve action potentials
Soares, Nucci & Silva	Surgery	Acute	pain	none given	none given
Vargo, Wilson, Fuentes & Eliam	Inpatient Rehabilitation	Rehabiliation/ Post Acute	none given	premorbid disability	none given
Cabilan, Hines & Munday	Surgical Prehabilitation	Other	none given	major surgery	none given
Doherty-King & Bowers	Medicine and Surgery Registered Nurses	Acute	patient resistance	none given	none given
Drolet, Dejuilio, Harkless, Henricks, Kamin, Leddy, Lloyd, Waters & Williams	ICU and Intermediate Care	ICU	frailty weakness pain fatigue tethering - catheters, Ivs	none given	none given
Engel, Tatebe, Alonzo, Mustille & Rivera	Medical and Surgical ICU	ICU	none given	Hypertension, chronic arterial disease, chronic joint pain/ neuropathy, haematological cancer, AF, hyperlipidemia, COPD, CVA, OA, end-stage liver disease, diabetes, substance misuse, GORD	none given
Friedman, Mayer, Hoyer & Atanelov	General Medicine	Acute	none given	none given	none given
Silveira, Pez, Nogueira, Furlan & Colombo	ICU	ICU	none given	none given	none given
Timmer, Unsworth & Taylor	Geriatric Rehabilitation	Rehabiliation/ Post Acute	none given	falls, manutrition, dementia, depression, incontinence
Sottile, Quan, McNulty, Gray, Higgins & Moss	ICU	ICU	none given	none given	ICU AW - CIPNM
Wakabayashi & Sakuma	Geriatric Rehabilitation	Rehabiliation/ Post Acute	malnutrition (87.6%, 12.4% at risk in authors cohort) - associated with poorer Functional outcomes and QOL on d/c. Obese do better than underweight/ normal BMI	CVA, lower limb fracture or joint replacement, debility, neurological disorders, brain dysfunction
Wakabayashi & Sashika	Geriatric Rehabilitation	Rehabiliation/ Post Acute	being underweight - worst rehab outcomes, 91% of HAD cohort were malnourished, CV and gastro diseases had worst bartel on admission	HF, ruptured AA, MI, elective CABG, other CV disease, cancers - bile duct, oseophageal, colon, liver, prostate, lymphoma, lukemia, myeloma, lung, pneumonia + interstitial, ileus, depression, dellerium, acute/chronic renal failure,	sarcopenia - syndrome characterised by progressive and generalised loss of skeletal muscle mass and strength, increased risk of disability, poor QoL and death. ICU-AW is clinically detected weakness with no eitiology other than critical care
Falvey, Mangione & Stevens-Lapsley	Geriatric Medicine	Acute	none given	none given	Iatrogenic disability - partial or wholly avoidable physical dependence associated with Functional decline Frailty - 3/5 muscle weakness, slow movement, self reported exhaustion, low physical activity, unitentional weight loss. insidious onset over months to years
Latronico	ICU	ICU	Critical illness, SIRS, MODS/failure, S&V, ICU delerium, hyperglycemia, corticosteroids, NM blockade , medication, ventilaition, sedation	none given	May mimic GBS, ALS and MG - acute resp failure
Timmer, Unsworth & Taylor	Geriatric Rehabilitation Occupational Therapists	Rehabiliation/ Post Acute	Age	none given	none given
Artaza, Valera, San Juan, Urien, Fernandez & Malafarina	Functional Recovery Unit	Rehabiliation/ Post Acute	none given	none given	none given
Booth, Rivet, Flici, Harvey, Hamill, Hundley, Holland, Hubbard, Trivedi & Collier	Neurotrauma ICU	ICU	depth of sedation, physiologic instability, complex care needs - trauma, neurotrauma	none given	none given
Fisher, Graham, Krishnana & Ottenbacher	Geriatric Rehabilitation	Rehabiliation/ Post Acute	none given	none given	none given
Galloway, Karmarkar, Graham, Tan, Raji, Granger & Ottenbacher	Inpatient Rehabilitation	Rehabiliation/ Post Acute	Co-morbidities most associated with readmission = Chronic pulm disease (30), CHF, fluid/electrolyte disorders, PVD, weight loss, solid tumor no mets, lymphoma, liver diseases. AGE WEIRDLY PRoccupational therapists,ECT- maybe survivor bias, those that stay out more robust. Incr re/ed: non white, not married. Low body weight, low BP- increased mortality (different study?)	Primary dx may be- debility, generalized weakness, infection or multisystem pathology (lots of codes). HF, septicimia, kidney/UTI. Table 2- top 5 = HTN, COPD, CHF, Diabetes no complications, Deficency anemia	none given
Pack, Miwa, Engleman, Lagu, Visintainer, Lindenauer & Woodbury	Cardiac Surgery	Acute	none given	none given	none given
Corcoran, Gavaghan, Lyons & Moloney	Geriatric Medicine	Acute	frailty cognitive/ Functional deterioration at admission	none given	Frailty - HAD a risk in hospital environment but frail older adult already deconditioned
Norheim, Bautmans & Kjaer	Geriatric Medicine	Acute	Inflammation - sustained elevated CRP - associated with being weaker and less fatigue resistant, no improvements in muscle function despite reduced inflammation,	Respiratory/ Infectious disease MSK disease and injury GU and Digestive diseases Encodrine and Immunological Cardiovascular and Neurological diseases	none given
Ritchie, Wood, Martin & Jones	Geriatric Medicine Nursing Assistants	Acute and Post Acute	none given	none given	Vague reference to social or clinical iatrogensis
Burkhardt & Parigger	Geriatric Early Rehabilitation	Rehabiliation/ Post Acute	none given	none given they were admitted due to pneumonia, fluid imblance heart failure	none given
Churilov, Churilov, Maclsaac & Ekinci	Inpatient Rehabilitation	Rehabiliation/ Post Acute	none given	sarcopenia	sarcopenia - but HAD as the diagnosis
Donnelly, Jevons and Wentworth	Geriatric Rehabilitation	Rehabiliation/ Post Acute	cognitive frailty	dementia	none given
McInerney, McCarthy, McCullagh, Fox & Timmons	Geriatric Medicine	Acute	none given	none given	none given
O'Sullivan & Cleffken	ICU	ICU	none given	none given	none given
Petrucci, Ricotti, Monteleone, Ferriero, Giromini, Guillace, Ambrosini, & Dalla Toffola	Geriatric Surgery	Acute	Influencers - depression, bloods, BMI, post op complications.	Development of post surgical complications Surgically treated, age related cancers eg bowel Presence of pain at last rehab session predicts walking for oncology used CCI to measure this PDDS predicts for all other groups	none given
Stapley, Colley & Richards	Geriatric Medicine	Acute	none given	none given	none given
Yoshimura, Wakabayashi, Bise & Tanoue,	Convalescent Rehabilitation	Rehabiliation/ Post Acute	Malnutrition Sarcopenia appears to be a major cause of ADL limitations (weak independent association)	people with sarcopenia tended to be older, more malnourished and more severe co morbidities	none given
Churilov, Churilov, Brock, Murphy, Macisaac, & Ekinci	Inpatient Rehabilitation	Rehabiliation/ Post Acute	Higher SARC-F score associated with lower FIM and QOL	sarcopenia	none given
Dirkes & Kozlowski	ICU	ICU	Age- less to start with and accelerated loss of muscle mass Obesity (although poses more challenge to staff) pain delerium Poor activity tolerance ICU-AW Female sex hyperglycemia hypoalbuminemia parenteral nutrition corticosteroid use use of NM blockade	Critical illness or sepsis	none given
Gordon, Grimmer & Barras	Geriatric Medicine	Acute	Older age but can occur at any age	none given	Frailty - large overlap in symptom profiles. HAD appears to occur more rapidly (hours), frailty more insideous - over a longer period of time
Horgan, Carr & Murphy	General Medicine	Acute	none given	none given	none given
Husain-Qureshi & Kirkwood	ICU	ICU	none given	none given	none given
Johnson, Swiatek, Wang, Liu, Chung, & Chung	Surgery	Acute	Raised elixhauser score (8+) (comorbidity score, 31 different conditions, higher = worse health states) Advancing age - 2.1% per year over 45 (lowest incidence) drops from age 18 peak Smoking	DVT (23% had PHS) Coronary artery disease (16.1% had PHS) Hypertension Obsesity See table 4 Females most like to develop PHS following acute post op pain, post term pregnancy Males = Leg cellulitis or abscess,	none given
Parksinon	Orthopedics	Acute	none given	none given	none given
Rogerson & Kendall	Geriatric Medicine	Acute	none given	"social admissions"	none given
Timmer, Unsworth, & Browne	Geriatric Rehabilitation	Rehabiliation/ Post Acute	none given	none given	none given
Asif, Taube, Sivarajah, Tsironis & Koizia	Surgery	Acute	none given	none given - associated with hospital acquired infections vaguely	none given
Bono & Reyes	Medicine and Surgery Registered Nurses, Patient Care Associates and Residents	Acute	none given	delerium,	none given
Higgins, Frazier, Lennie, Rayens & Avila	Major Trauma	Acute	worse pre injury function. Baseline function predictive of post strength and muscle bulk and in hospital ambulation poor pain control - confounding variable	combo of trauma and immobility - decrease skeletal muscle strenght by 28%, trippled loss of mass	none given
Kamper, Schultz, Hasen, Andersen, Ekmann, Nygaard, Helland, Wejse, Rahbek, Noerst, Pressel, Nielsen, Finn & Suetta	Acute Medicine	Acute	sarcopenia makes Functional decline worse, attenuates recovery 3 months after discharge	sarcopenia	none given
Koh, Sridaran, & Goh	Orthopedics	Acute	dependency on nurse for ambulation and ADLs	HAD contributes to lower limb weakness and increases falls risk through prolonged bed rest	none given
Kovar, Carmichael, Jones, & Nichols Robsinson	Elective Surgery	Acute	presecence of delerium associated with longer recovery to baseline ambulation	dementia	none given
Small, Tasneem, Bagheri, Chodosh, Adelsheimer, Sutera & Moroz	General Medicine	Acute	none given	none given	none given
Smtih, Sreekanta, Walkeden, Penhale & Hanson	Inpatient Rehabilitation	Rehabiliation/ Post Acute	Increased age Delerium on admission Multiple co-morbidities Cognitive deficits Poor mobility/ use of aid Deficits in BADL or IADL at adm/dc or both Fear of falling use of tethering intervention - catheters/ lines	none given
Suriyaarachchi, Chu, Bishop, Thew, Matthews, Cowan, Gunawardene & Duque	Virtual Rehabilitation Beds	Rehabiliation/ Post Acute	Delerium - lowest FIM scores noted on admission The patients who showed the best treatment response were those who had exacerbation of arthritis (mean FIM gain: 22)	sarcopenia frailty pain most common adm dx falls - 61 patients UTI/ chest infection - 28 patients	sarcopenia - syndrome characterised by progressive and generalised loss of skeletal muscle mass and strength, with risk of physical disability, poor QoL and death. (low grip strength and gait speed) Frailty - state of reduced physiological reserve associated with increased susceptability to disability (3/5 weak grip, slow gait, exhaustion, weight loss, low energy expenditure)
Butler & Welford	Geriatric Medicine	Acute	none given	none given	none given
Guilcher, Everall, Cadel, Li, & Kuluski	Acute Medicine Patients, Caregivers, Providers and Decision Makers	Acute	Older age Physical complexity Social complexity - precarious housing, finacial instability, limited caregiver support (often spouse or child)	multi morbidity - dementia, heart disease, diabetes, cancer, kidney failure	none given
Laneuville, Rocheleau, Chan Chun, Pelchat & Trudel	Inpatient Rehabilitation	Rehabiliation/ Post Acute	none given	multimorbidity	none given
Sayer, Whiteaway, Dawson, Simpson & Chu	Geriatric Medicine	Acute	none given	none given	none given
Siebens, Aronow, Edwards, & Ghasemi	Medicine and Surgery	Acute	patients with lower education levels more likely to have a lower dose of exericse	Digestive disease - 29.3% Resp - 20% Circulatory - 7.3% HPB+ pancreas- 6.3% Male reproductive- 5.3% Skin, subcut or breast - 4.7% Kindey/UTI - 4.7% Female reproductive - 4.7% other - 17.6%	none given
Hoenig and Rubenstein	Geriatric Medicine	Acute	Functional status on admission predictive of function at d/c (single best early predictor of d/c location) Older age	pneumonia?	none given
Creditor	Geriatric Medicine	Acute	Usual ageing process Being at threshold of Functional disability Pre existing continence issues Pre existing sensory/ perceptive issues	hip fracture	none given
Inouye, Wagner, Acampora, Horwitz, Cooney, Hurst & Tinetti	General Medicine	Acute	Decubitus ulcer RR 2.7 CI 1.4-5.2 Cognitive impairment RR 1.7 CI 0.9- 3.1 Functional impairment RR 1.8 CI 1-3.3. Low social activity RR 2.4 CI 1.2 - 5.1 older>younger (5 initial axes - demographic, physical function, cogntive function, biomedical and psychosocial- table 2)	none given	none given
Inouye, Bogardus, Baker, Leo-Summers & Cooney	All	Acute	Older patients - multiple chronic conditions, physiological impairments, decreased reserve, polypharmacy	pneumonia, chronic lung disease, cogestive heart failure, ischemic heart disease, GI disease	none given
Brown, Friedkin & Inouye	General Medicine	Acute	none given	none given	none given
Brown, Rothe, Peel, & Allman	All	Acute	Age over 85, white, use of walking aid, Functional impairment pre hosp Severity of illness, bed rest orders, use of tethering devices	Hip fracture, hypotension, DVT, CVA without weakness, major surgery, hx of hemiparesis regardless of cause, TIA, PD, seizures	none given
Graf	Geriatric Medicine	Acute	age, cognitive impairment	Stroke, cancer, CCF, pneumonia, coronary heart diease, hip fracture inpatient falls, fractures, drug reactions, nosocomial infections, use and consqeunce of phsyical/ chemical restraint = longer LOS, cognitive changes, reduced ability to do ADLs	Frailty - an evolving geriatric contiuum where frailty is a mid point between independence and death. 3+ of unintentional weight loss past year, weak grip, slow walking, low physical activity. May encompass concepts like failure to thrive, anorexia, sarcopenia, dementia
Kortebein, Bopp, Granger & Sullivan	Geriatric Rehabilitation	Rehabiliation/ Post Acute	none given	Diabetes, CHF, AF, GU diesase (everything except kidney disease), infection, depression, hypertension, degenerative joint disease, CAD, post surgical, anemia, hemiparesis, COPD, sleep disorder, hypothyroidism	analouge to early description of frailty - you know it when you see it.
Covinsky, Pierluissi & Johnston	Geriatric Medicine	Acute	Age (85+), Being frail, having slow gait speed, cognitive impairment, psychosocial - depression, limited social support, immobility, polypharmacy, falls, incontinence, delerium, use of walking aid.	Pneumonia, CHF, renal/ GU issues	Range of geriatric syndromes - falls, delerium and incontinence
Haley, Sullivan, Granger, & Kortebein	Geriatric Rehabilitation	Rehabiliation/ Post Acute	none given	pnemonia	none given
Krumholz	All	Acute	none given	none given	PHS - readmission rate in 30 days, deconditioning a feature of PHS
Sanchez-Rodriguez, Marco, Miralles, Fayos, Mojal, Alvardo, Vazquez-Ibar, Escalada & Muniesa	Subacute Geriatric Rehabilitation	Rehabiliation/ Post Acute	Sarcopenia exacerbates Functional decline and impairs restoration of function	resp or urinary infections, heart or renal failure	sarcopenia as an exagerating influence on HAD severity
Chastin, Harvey, Dall, McInally, Mavroeidi & Skelton	All	Acute	Stroke 8% upright time in rehab Geri rehab 70 mins +/-50, 70% time standing or walking in less than 5 min bits. Psychological -"I'm sick" mindset	none given	sed behaviour possible cause of PHS
Hartley, Keating, Jeffs, Raymond & Smith	General Medicine	Acute	none given	Infections, Heart Failure, Kidney/Renal Failure, GI Bleeding, Vertigo	HA-Functional Decline = increased dependence in ADL. But also decline in Functional mobility, cognition, quality of life
Swinnerton & Price	Geriatric Medicine	Acute	Cathertisation, falls, delerium, decreased muscle size, decreased strength, balance difficulties, increased breathlessness or tachycardia on physical exertion or mobilisation, age over 65, people with frailty, obesity, acute injury or illness which affects ability to mobilise	Frailty - deconditioning increases the risk of developing frailty , Sarcopenia, Dysphagia, Oral infections, Delerium (Pain, Infection, Nutrition, Constipation, Hydration, Medication, Environment), Dementia	Sarcopenia = a progressive loss of skeletal muscle mass linked to ageing. Characterised by loss of fast twitch fibers, increased fatty deposits in muscles, and ageing of cellular mitchondria leading to decline in over all function of muscle tissue. Associated with reduced strength, closely related to falls and frailty in older people. Frailty = a clinical syndrome characterised by marked vulnerab…
Beam, Gorman, Kist, Giles, Kiser & Dumire	Medical and Surgical	Acute	Not necessarily risk but inflential factors which affect mobility in elderly = comorbidities, prior health history, baseline mobility, complications from hospitalisation	Most common diagnosis = Fracture (strutural issues, pain), Sepsis/ Infection and osteoarthritis (also acute pain, ambulatory dysfunction, benign neoplasm, bowel obstruction, CVD, cholecystis, cirrohosis, electrolyte disturbance, GI bleed, malignant neoplasm, pancreatitis, procedural complications, renal failure, respiratory failure, syncope)	None given
Beisheim-Ryan, Butera, Hinrichs, Derlein, Malong, Holtrop, Forster, Diedrich, Gustavson, & Stevens-Lapsley	Skilled nursing facilities	Rehabiliation/ Post Acute	none given	none given	none given
Sourdet, Lafont, Rolland, Nourhashemi, Andrieu & Vellas	Geriatric Medicine	Acute	Increasing age, cognitive impairment	none given	none given
Wai, Lu, Gill, Henderson and Auais	General Medicine	Acute	Increasing age	Falls, Pressure Injury	none given
Urquiza, Fernandex, Arrinda, Espin, Garcia-Garcia, Rodriguez-Larrad and Irazusta	Orthogeriatric Rehabilitation	Rehabiliation/ Post Acute	patient's comorbidities, physiologic reserve, severity of acute illness, and hospital care processes.	Patients with hospital-acquired deconditioning more likely to live alone, have higher co-morbidity	none given
Pavon, Sloane, Pieper, Colon-Emeric, Cohen, Gallagher, Hall, Morey, McCarty and Hastings	General Medicine	Acute	none given	failure to thrive in 39% (n = 18), gastrointestinal in 22% (n = 10), cardiac in 11% (n = 5), neurological in 11% (n = 5), infectious in 9% (n = 4), and other in 9% (n = 4)	none given
Ortiz-Alonso, Bustamante-Ara, Valenzuela, Vidan-Astiz, Rodriguez-Romo, Mayordomo-Cava, Javier-Gonzalez, Hidalgo-Gamarra, Lopez-Tatis, Valades-Malagon, Santos-Lozano, Lucia, and Serra-Rexach	Geriatric Medicine	Acute	none given	dementia, depression, falls, chronic pain, malnutrition, urinary incontinence, frailty phenotype, incident delerium, polypharmacy	none given
